# Supplementary material for: Mass media representation of suicide in a high suicide state in India: an epidemiological comparison with suicide deaths in the population
Source: PubMed Central journal article supplement — BMJ Open. 2019 Jul 18;9(7):e030836. doi: 10.1136/bmjopen-2019-030836 (PMC6661630; doi:10.1136/bmjopen-2019-030836), 2019-07-18
Supplement: bmjopen-2019-030836.draft_revisions.pdf [file bmjopen-2019-030836.draft_revisions.pdf]

# BMJ Open

BMJ Open is committed to open peer review. As part of this commitment we make the peer review history of every article we publish publicly available.

When an article is published we post the peer reviewers' comments and the authors' responses online. We also post the versions of the paper that were used during peer review. These are the versions that the peer review comments apply to.

The versions of the paper that follow are the versions that were submitted during the peer review process. They are not the versions of record or the final published versions. They should not be cited or distributed as the published version of this manuscript.

BMJ Open is an open access journal and the full, final, typeset and author-corrected version of record of the manuscript is available on our site with no access controls, subscription charges or pay-per-view fees (<http://bmjopen.bmj.com>).

If you have any questions on BMJ Open's open peer review process please email [info.bmjopen@bmj.com](mailto:info.bmjopen@bmj.com)

# BMJ Open

## Mass media representation of suicide deaths in India: an epidemiological comparison with suicide deaths in the population

|                               |                                                                                                                                                                                                                                                                                                                                                                                                                                                                                                                                                                                                                                                                                                                                                                                                                                                         |
|-------------------------------|---------------------------------------------------------------------------------------------------------------------------------------------------------------------------------------------------------------------------------------------------------------------------------------------------------------------------------------------------------------------------------------------------------------------------------------------------------------------------------------------------------------------------------------------------------------------------------------------------------------------------------------------------------------------------------------------------------------------------------------------------------------------------------------------------------------------------------------------------------|
| Journal:                      | <i>BMJ Open</i>                                                                                                                                                                                                                                                                                                                                                                                                                                                                                                                                                                                                                                                                                                                                                                                                                                         |
| Manuscript ID                 | bmjopen-2019-030836                                                                                                                                                                                                                                                                                                                                                                                                                                                                                                                                                                                                                                                                                                                                                                                                                                     |
| Article Type:                 | Research                                                                                                                                                                                                                                                                                                                                                                                                                                                                                                                                                                                                                                                                                                                                                                                                                                                |
| Date Submitted by the Author: | 03-Apr-2019                                                                                                                                                                                                                                                                                                                                                                                                                                                                                                                                                                                                                                                                                                                                                                                                                                             |
| Complete List of Authors:     | <p>Armstrong, Gregory; The University of Melbourne, Nossal Institute for Global Health, Melbourne School of Population and Global Health, Vijayakumar , Lakshmi ; Voluntary Health Services Hospital, Department of Psychiatry</p> <p>Pirkis, Jane; University of Melbourne, Centre for Mental Health, Melbourne School of Population Health</p> <p>Jayaseelan, Mala; Voluntary Health Services Hospital, Department of Psychiatry</p> <p>Cherian, Anish; National Institute of Mental Health and Neuro Sciences, Department of Psychiatric Social Work</p> <p>Soerensen, Jane; Kobenhavns Universitet, Department of Public Health</p> <p>Arya, Vikas; Translational Health Research Institute (THRI)</p> <p>Niederkrötenhaler, Thomas; Medical University of Vienna, Center for Public Health, Department of General Practice and Family Medicine</p> |
| Keywords:                     | Suicide & self-harm < PSYCHIATRY, MENTAL HEALTH, JOURNALISM (see Medical Journalism)                                                                                                                                                                                                                                                                                                                                                                                                                                                                                                                                                                                                                                                                                                                                                                    |
|                               |                                                                                                                                                                                                                                                                                                                                                                                                                                                                                                                                                                                                                                                                                                                                                                                                                                                         |

SCHOLARONE™  
Manuscripts

# Mass media representation of suicide deaths in India: an epidemiological comparison with suicide deaths in the population

Gregory Armstrong<sup>1\*</sup>, Lakshmi Vijayakumar<sup>2,3</sup>, Jane Pirkis<sup>4</sup>, Mala Jayaseelan<sup>2</sup>, Anish Cherian<sup>5</sup>, Jane Brandt Sørensen<sup>6</sup>, Vikas Arya<sup>7</sup>, Thomas Niederkrotenthaler<sup>8</sup>

<sup>1</sup> Nossal Institute for Global Health, The University of Melbourne, Melbourne, Australia

<sup>2</sup> Department of Psychiatry, Voluntary Health Services, Chennai, India

<sup>3</sup> SNEHA Suicide Prevention Centre, Chennai, India

<sup>4</sup> Centre for Mental Health, The University of Melbourne, Melbourne, Australia

<sup>5</sup> Department of Psychiatric Social Work, National Institute of Mental Health and Neurosciences, Bengaluru, India.

<sup>6</sup> Department of Public Health, University of Copenhagen, Denmark

<sup>7</sup> Translational Health Research Institute, The University of Western Sydney, Sydney, Australia

<sup>8</sup> Centre for Public Health, Medical University of Vienna, Vienna, Austria

Corresponding author:

Gregory Armstrong, Nossal Institute for Global Health, Melbourne School of Population and Global Health, University of Melbourne, 333 Exhibition St, Melbourne, Victoria 3010, Australia. Email: [g.armstrong@unimelb.edu.au](mailto:g.armstrong@unimelb.edu.au)

## Abstract

### Objectives:

Suicide rates in India are among the highest in the world, equating to over 200,000 suicides annually. Reports of suicides are a routine feature in major newspapers in India, and reporters may selectively present “newsworthy” suicide stories. The aim of this paper was to systematically investigate whether mass media reports of suicides reflect the epidemiological data on suicide in India.

### Design:

We extracted socio-demographic data on suicides reported among nine of the most highly read daily newspapers in the southern state of Tamil Nadu between June-December 2016. Five of the nine newspapers under review were in the top 20 most circulated daily newspapers in the country. A total of 1,258 newspaper articles were retrieved containing reports on 1,631 suicides. Two-tailed binomial tests on aggregate frequencies assessed whether the socio-demographic characteristics of suicides in the newspaper articles were different to the population suicide statistics for Tamil Nadu.

### Results:

We identified some statistically significant discrepancies between suicide characteristics in the population and the media. Suicides involving females, those aged under 29 years, separated or widowed males, unmarried females, those using more lethal methods, and those

1  
2  
3 who were students or working in the agricultural sector were significantly over-reported  
4 relative to their occurrence in the broader population.  
5  
6

### 7 **Conclusions:**

8 The suicide characteristics in the print media were not entirely representative of suicides in  
9 the broader population, which may lead the general public to develop misunderstandings  
10 about suicide. The discrepancies we identified will inform tailored suicide prevention  
11 education for media professionals.  
12  
13  
14  
15

### 16 **Strengths and limitations of this study**

- 17 • Suicides are a routine feature in major newspapers in India, and this is the first study  
18 to examine whether these media reports of suicides reflect the epidemiological data  
19 on suicide in India.
- 20 • We followed nine major newspapers over seven months and collected a large sample  
21 of 1,631 media reports of suicides.
- 22 • We only looked at printed newspapers and further funding it would be desirable to  
23 examine media reports by other forms of mass and social media.
- 24 • A large proportion of suicides are not captured in the official suicide statistics in  
25 India, due to a sole reliance on police data and the lack of a comprehensive and  
26 reliable vital registration system. Given both the official statistics and the media  
27 reports used in this study are based on police reports of suicide, we expect that this  
28 will have a negligible effect on the comparisons made in our study.
- 29 • While our findings provide some epidemiological clues as to the decisions made by  
30 media professionals in choosing whether to report on a suicide, further qualitative  
31 research with media professionals is required to better understand the decision-  
32 making process and any biases that may be involved.  
33  
34  
35  
36  
37  
38  
39  
40  
41  
42  
43  
44  
45  
46  
47  
48  
49  
50  
51  
52  
53  
54  
55  
56  
57  
58  
59  
60

## Background

Southeast Asia accounts for roughly 40% of the estimated 800,000 suicides that occur each year globally<sup>1</sup>. Suicide rates in India are among the highest in the world with the most recent suicide death rate estimates ranging between 18-21 deaths per 100,000 population (*c.f.* the global average of 11/100,000). This equates to an estimated 230,000-250,000 suicide deaths annually with far-reaching social, emotional and economic consequences<sup>1,2</sup>. A public health approach to suicide is gaining momentum in India with calls for the development of national and state-level suicide prevention strategies, including the development of media guidelines to improve mass and social media coverage of suicides<sup>3</sup>.

One of the few recommended suicide prevention strategies at the population level is responsible media reporting of suicides<sup>4-6</sup>, based on evidence around copycat suicides, dissemination of suicide methods and behaviours, and the imperative to deliver tailored suicide prevention messaging in media content<sup>7-12</sup>. Consequently, the World Health Organization (WHO) recommends that public health specialists should engage with media professionals to limit irresponsible media coverage (for example, reports that sensationalise suicide) and to promote coverage that educates the public about suicide<sup>13</sup>.

The manner by which the mass media communicates with the Indian public on the topic of suicide in India has thus far gone without sufficient inquiry<sup>14</sup>. Our own recent research into print media portrayals of suicide in India observed that explicit suicide reports are a routine feature, and that potentially harmful reporting practices are common<sup>15</sup>. For example, a detailed suicide method was reported in 43.3% of articles. Given that there are few alternative sources of publicly-disseminated information on suicide in India, as the suicide prevention sector is relatively under-resourced, these mass media portrayals of suicide are quite possibly playing a critical role in shaping and reflecting public attitudes and behaviours in relation to suicide.

Researchers have long recognised the disparity between the epidemiological data on suicide in the population and the stories selectively presented for mass media reports<sup>16</sup>. In suicide prevention, there is a major focus on disseminating knowledge on the risk factors and the complex multilayered context for suicide<sup>6</sup>. This can be at odds with media preferences for newsworthy stories that are atypical or that play to broader social narratives of interest to readers. Hence, one important area of enquiry for suicide prevention is to better understand what kinds of suicides media broadcast to the public, to shed light on possible misunderstandings of the epidemiological realities that can inform media training and engagement strategies. Very few studies have examined which suicides tend to feature in the media. Those that have, found that the mass media selectively present newsworthy suicide stories that do not reflect the broader array of suicides in the population<sup>17-20</sup>, which can carry profound implications for the social and political responses to suicide.

This phenomenon is yet to be studied in India. This paper seeks to address this gap in the literature by comparing the characteristics of suicides in print media reports in India against the characteristics of suicides in the population. We elected to undertake a comprehensive study of newspaper reporting in one state, the southern state of Tamil Nadu (population = 72 million), which consistently has one of the highest suicide rates in India (22.8/100,000) equating to 15,777 recorded suicides in 2015, over 40 suicides per day<sup>21</sup>. The approach of

1  
2  
3 focusing on one state allows us to comprehensively track changes in media reporting in this  
4 state following upcoming efforts to engage with the media on this topic.  
5

## 6 7 **Methods**

8 As part of the Suicide in the Indian Media (SIM) project <sup>15</sup>, we undertook a content analysis  
9 study of articles reporting suicide-related news in nine of the ten most highly read vernacular  
10 and English-language daily newspapers in Tamil Nadu over the 7-month period between 1<sup>st</sup>  
11 June and 31<sup>st</sup> December 2016. The nine newspapers collectively have an estimated average  
12 daily readership of over 16,000,000 people in Tamil Nadu alone <sup>22</sup>. Five of the nine  
13 newspapers under review are in the top 20 most circulated daily newspapers in the country <sup>23</sup>,  
14 giving the findings relevance beyond Tamil Nadu. We previously published research from  
15 this content analysis study where we assessed the quality of newspaper reporting of suicide-  
16 related news against World Health Organization suicide reporting guidelines <sup>13 15</sup>.  
17  
18

19 To source the articles, the hardcopies of all 1,926 (9 newspapers x 214 days) editions of the  
20 nine newspapers during the study period were hand searched by three trained research  
21 assistants (psychologists), allowing us to include several newspapers that did not have a  
22 strong online presence. Our search yielded 1,258 articles containing reports on 1,631  
23 suicides. We excluded articles where suicide was only mentioned briefly (i.e. <50% of the  
24 article) and articles with a focus on terrorist-related suicide bombings or euthanasia.  
25  
26

27 A bi-lingual psychologist and researcher (MPsych, MPhil) extracted data on gender, age,  
28 marital status, suicide method and occupational status for each suicide. We compared the data  
29 extracted from the newspaper articles with the characteristics of suicides in the Tamil Nadu  
30 population suicide statistics found in the Accidental Death & Suicides in India report for  
31 2015 published by the National Crime Records Bureau (NCRB) <sup>21</sup>.  
32  
33

34 Comparing occupational status between the two data sets was complicated by the use of  
35 broad category descriptors in the NCRB data (for example, ‘professionals/salaried persons’)  
36 that were not possible to reproduce. However, there were two occupational categories that  
37 were distinct enough to legitimately reproduce and examine; ‘students’ and ‘persons engaged  
38 in the farming sector’. Both are occupational groups that have been of significant interest to  
39 suicide prevention in India and would resonate strongly with the public when discussing the  
40 topic of suicide <sup>24 25</sup>.  
41  
42

43 We disaggregated the data by gender, and in doing so we excluded suicides of *Hijra* and  
44 transgender people due to the very small numbers of such cases; there were 13 reports of  
45 suicide deceased who were Hijra/transgender in the newspaper articles and 2 such suicide  
46 deceased in the official suicide records for Tamil Nadu.  
47  
48

49 Two-tailed binomial tests on aggregate frequencies were used in Stata (command “prtesti”) to  
50 assess whether the distribution of the characteristics of suicides in the newspaper articles was  
51 different to their distribution in the population suicide statistics for Tamil Nadu. This analysis  
52 approach has been used previously by a similar media study in Austria <sup>17</sup>. Not all media  
53 reports contained data on all the variables we analysed, so percentages were calculated based  
54 on data for those individuals for whom these characteristics were reported in the article.  
55  
56

## 57 **Results**

58 Binomial tests showed that female suicides were over-reported relative to their occurrence in  
59 the broader population of suicides, comprising 45.3% (729/1610) of suicides in newspaper  
60

1  
2  
3 reports compared to 32.0% (n=5041/15775) of suicides in the official suicide statistics  
4 (p<0.001) (see Figure 1). While newspapers covered a significantly higher percentage of  
5 female suicides, this was not the case across all age groups. There was no statistically  
6 significant difference in the <18 years age group, and we observed the reverse pattern in the  
7 60+ years age group, such that female suicides were significantly under-reported.  
8  
9

10 Binomial tests showed that the suicides of those aged less than 29 years were over-reported  
11 relative to their occurrence in the broader population (see Table 1). Conversely, the suicides  
12 of those aged 30 years or older were under-reported. The suicides of those who were  
13 unmarried, separated and widowed were over-reported, while the suicides of those who were  
14 married were under-reported. The gender stratification of these marital status results  
15 highlighted a significant gender-based difference. Suicides among separated males were  
16 over-reported while the suicides of separated females were under-reported. For females, it  
17 was the suicides of those who were unmarried that were over-reported, while such deaths  
18 were not significantly over-reported among males.  
19  
20

21 The suicides of students and those engaged in the farming sector were over-reported relative  
22 to their occurrence in the broader population (see Figure 2). Students comprised 15.6%  
23 (255/1631) of all suicides in newspaper reports compared to 6.1% (955/15775) of suicides in  
24 the official suicide statistics (p<0.001). People engaged in the farming sector comprised 6.3%  
25 (102/1631) of all suicides in newspaper reports compared to 3.8% (606/15775) of suicides in  
26 the official suicide statistics (p<0.001). Conversely, the suicides of females in the agricultural  
27 sector were under-represented in media reports.  
28  
29

30 Deaths involving hanging, coming under vehicle/train, jumping off building/structure and  
31 self-inflicted injury such as a knife wound were over-reported, while suicides by poisoning  
32 were under-reported (see Table 1).  
33  
34

## 35 Discussion

36 The present study identified substantial disparities between suicide characteristics in the  
37 population and the media. Suicides involving females, those aged under 29 years, separated  
38 or widowed males, unmarried females, and those using lethal methods (other than pesticides)  
39 were significantly over-reported relative to their occurrence in the broader population. The  
40 suicides of people from the occupational groups of students or persons engaged in the  
41 agricultural sector were also over-reported.  
42  
43

44 An important finding was that female suicides were significantly over-represented, relative to  
45 their occurrence in the population. This finding appears to be unique to India and is in stark  
46 contrast to what has been observed elsewhere. No under or over-reporting was observed in  
47 Australia<sup>19</sup> or Austria<sup>17</sup> based on gender. However, in the Chinese settings of Guangzhou  
48 and Taiwan, female suicides have been observed to be under-reported<sup>20</sup>, the opposite pattern  
49 to our findings. The authors posited that, in traditional Chinese societies, women can be  
50 stereotyped as being more emotional or hysterical, and more prone to suicide. Such that, they  
51 felt media professionals may perceive the suicide deaths of men to be more unusual and thus  
52 newsworthy.  
53  
54  
55

56 In India, the female suicide rate is among the highest in the world, and is nearly three times  
57 higher than the rate expected globally for countries at similar levels of Socio-Demographic  
58 Index<sup>2</sup>. This well-documented fact about suicide in India could possibly permeate the minds  
59 of media professionals, who may then give greater emphasis to the plight of females who  
60

1  
2  
3 take their lives. Notwithstanding this, it is also likely that there are some other reasons media  
4 professionals decide that the suicides of females are more newsworthy. Based on our  
5 anecdotal conversations with media professionals, we speculate that female suicides may also  
6 be perceived by media professionals to generate a greater empathic response among readers  
7 of newspapers in India. Stories of the suicides of females may align with paternalistic  
8 narratives about the risks to women in Indian society and the family and collective  
9 responsibility to protect them <sup>26</sup>.  
10  
11

12 We also observed an under-reporting of suicides of married males and females. Moreover, we  
13 observed that, among female suicides, there was an over-reporting of suicides among those  
14 who were unmarried. This was quite distinct from what was observed among male suicides,  
15 where suicides by separated or widowed males were over-reported in the newspapers. It is  
16 unclear why there is an apparent media preference for stories of unmarried females and  
17 separated or widowed males, nor what cultural scripts or narratives this may align with.  
18 Marriage and family are at the core of the social fabric in India <sup>27</sup>, and family is the main  
19 source of welfare protections. We speculate that risks associated with being outside of the  
20 institution of marriage may be being emphasised by media professionals through their  
21 selection of suicide stories pertaining to people whose marriage has been lost or who are yet  
22 to enter marriage. Through this under-reporting of suicides of married people, these media  
23 reports may actually be giving an incorrect signal to the population with regard to any suicide  
24 prevention protections that may be assumed to be gained from being married. It is important  
25 to that that while marriage is typically understood to protect against suicide, particularly for  
26 men, based on findings from studies in Western settings <sup>28</sup>, this is not the case in India.  
27 Research undertaken in India yields mixed findings regarding the relationship between  
28 marital status and suicide for both men and women, suggesting that either marriage is not a  
29 protective factor for suicide, or indeed that the risk of suicide is higher among those who are  
30 married <sup>29 30</sup>. This epidemiological reality regarding marriage and suicide may conflict with  
31 narratives in India that locate 'the family' as the main source of social protections. Clearly  
32 this is speculation, and so qualitative research with media professionals is required to better  
33 understand the phenomenon of the influential role of gender and marital status in the  
34 perceived newsworthiness of suicide deaths. We note though, that even such qualitative  
35 interviews may find it hard to unravel what may be unconscious and deeply culturally  
36 embedded biases among media professionals.  
37  
38  
39  
40  
41  
42

43 Our findings suggest that the suicides of younger persons aged <29 years were considered to  
44 be more newsworthy than the suicide deaths of persons aged 30 years and older. This finding  
45 is largely consistent with research from Australia <sup>19</sup>, Austria <sup>17</sup> and China <sup>20</sup>. It has been  
46 posited that youth suicides may be considered more newsworthy; that is, the death of a youth  
47 with their life ahead of them carries a sensational undertone that may grab the reader's  
48 attention <sup>20</sup>. Suicide is also the leading cause of death among youth in India aged 15-29 years,  
49 and greater than 70% of female suicide deaths and 50% of male suicide deaths are in this age  
50 group <sup>2</sup>. Thus, it is possible that media professionals may be attempting to give such suicide  
51 deaths greater emphasis without being aware that they may in turn be overlooking the issue  
52 of suicide among older aged people, also a high-risk period for both males and females in  
53 India <sup>2</sup>.  
54  
55

56 Our findings also revealed that the suicides of students and people engaged in the agricultural  
57 sector were significantly over-represented, relative to their occurrence in the population. This  
58 finding was not surprising, given that both occupational groups are of significant interest to  
59 the public discourse and narratives around suicide in India <sup>24 25</sup>. Media houses would be  
60



1  
2  
3 aware that reports on such deaths would resonate strongly with readers. Student suicides are a  
4 major and topical policy issue in India, frequently located within discussions around the  
5 fierce competition for student places and an accompanying intensity of exam pressure<sup>31</sup>.  
6 Reporting on this issue will likely be of great interest to parents, who may carry a level of  
7 fear around this happening to their own children. Farmer suicides are highly politicised in  
8 India, and have been the subject of numerous government commissions and policy dialogues.  
9 This has largely been with a focus on issues around the high levels of indebtedness among  
10 farmers, a decline in secure institutional credit, water scarcity, trade liberalisation, and a  
11 considerable vulnerability to “crop failure”<sup>32</sup>. Farmer suicide deaths have been described as  
12 “public deaths”, due to the perception that they receive sensational coverage by the mass  
13 media<sup>33</sup>.  
14  
15

16  
17 Finally, suicides by particular methods also appeared to attract more media attention. Deaths  
18 involving hanging, jumping, and coming under vehicle/train were over-represented in media  
19 reports, while suicides by poisoning were under-represented. One interpretation of this  
20 finding is that media may be attracted to reporting on suicides using methods with a higher  
21 degree of lethality, given that these have been observed to have a high case fatality rate<sup>34</sup>.  
22 Deaths involving self-inflicted injuries (e.g. knife wound) were also over-reported, even  
23 though this method does not have a high case fatality rate, indicating that newspaper reporters  
24 may also have an interest in particular suicide methods where it is easy for them to construct  
25 a graphic visual that may attract the attention of the reader. The under-reporting of poisoning  
26 suicide deaths is also an interesting finding. While the ingestion of medical drugs typically  
27 has a low case fatality rate<sup>34</sup>, the ingestion of pesticides, a common suicide method in India  
28 and elsewhere in South Asia<sup>35</sup>, has a high case fatality rate and is a major contributor to high  
29 suicide rates in this region<sup>36 37</sup>.  
30  
31  
32

33 These findings have important implications for suicide prevention. While the mass media are  
34 a powerful resource for educating the public about suicide, the general public may develop  
35 misunderstandings about suicide that are caused by media misrepresentations. For example,  
36 Till et al observed that the consumption of tabloid newspapers in Austria for daily  
37 information appeared to be an independent factor in the endorsement of misconceptions and  
38 myths about suicide<sup>38</sup>. While we didn't assess the articles for suicide myths, we did observe  
39 substantial disparities between suicide characteristics in the population and the media. Strong  
40 biases towards reporting particular types of suicide deaths may result in social and political  
41 responses to suicide that are not based on the epidemiological data. For instance, if media  
42 reports are overly biased towards the coverage of female suicides, youth suicides, suicides  
43 among particular occupational groups, or particularly graphic or more lethal suicide methods,  
44 this may inadvertently affect suicide prevention funding allocations, public perceptions about  
45 who is most at risk of suicide and the method they may use, among other possible  
46 consequences.  
47  
48  
49

50 The study has several limitations that are worth noting. Firstly, we compared data from media  
51 reports collected in 2016 against the official suicide statistics for 2015. While these are two  
52 different time periods, it is the most recently available suicide statistics for India and it is  
53 unlikely there is substantial variation between 2015 and 2016. Secondly, there is a high level  
54 of under-reporting of suicide in India. Given both the official statistics and the media reports  
55 are based on police reports of suicide, we expect that this will have a negligible effect on the  
56 comparisons made in our study. Thirdly, while our findings provide some clues as to the  
57 decisions made by media professionals in choosing whether to report on a suicide, we cannot  
58 speak definitively about the decision-making process and any biases that may be involved.  
59  
60

1  
2  
3 We are currently undertaking qualitative research with media professionals to better  
4 understand this phenomenon<sup>39</sup>. Fourthly, we were only able to examine the over or under-  
5 representation of two occupational categories that we could meaningfully reproduce. Finally,  
6 we only looked at printed newspapers and it would have been desirable to examine reports by  
7 other forms of mass and social media.  
8  
9

## 10 11 **Conclusion**

12 The suicide characteristics in the print media were not representative of suicides in the  
13 broader population, indicating that a skewed picture of reality is being presented to the  
14 community. The discrepancies we identified will inform tailored suicide prevention education  
15 for media professionals.  
16  
17

## 18 19 **Contributors**

20 GA designed the study, supervised the data collection, undertook the data analyses and wrote  
21 the first draft of the manuscript. LV and TN supported the design of the study. MJ  
22 implemented data collection. All authors read and improved the final manuscript and assisted  
23 in interpreting the findings.  
24  
25

## 26 27 **Acknowledgements**

28 We thank Ms Asha Ramia Veeraraghavachary, Mrs Thangaraj Fathima Roseline and Ms  
29 Nivetha Vincent from Voluntary Health Services in Chennai for their thorough work in hand  
30 searching the nine newspapers for the relevant articles for this study.  
31

## 32 33 **Competing interests**

34 None declared.  
35

## 36 37 **Patient and public involvement**

38 This study did not involve patients.  
39

## 40 41 **Ethics approval**

42 The data used in this study are from publicly available documents. Nonetheless, we obtained  
43 ethics approvals from the Human Ethics Advisory Group at The University of Melbourne in  
44 Australia (ID: 1646245.1).  
45

## 46 47 **Funding**

48 The lead author is funded by an Early Career Fellowship from the National Health and Medical Research  
49 Council in Australia (GNT1138096). This study was funded by Early Career Researcher Awards from The  
50 Society for Mental Health Research and The University of Melbourne.  
51

## 52 53 **Data sharing**

54 The data used in this study are publicly available media reports and publicly available official  
55 reports on suicides in India. Anyone interested in accessing our database on media reports of  
56 suicides may contact the corresponding author.  
57  
58  
59  
60

## References

1. World Health Organization. Preventing suicide: A global imperative. Geneva: World Health Organization 2014.
2. India State-Level Disease Burden Initiative Suicide Collaborators. Gender differentials and state variations in suicide deaths in India: the Global Burden of Disease Study 1990-2016. *Lancet Public Health* 2018;3(10):e478-e89. doi: 10.1016/S2468-2667(18)30138-5 [published Online First: 2018/09/17]
3. Armstrong G, Vijayakumar L. Suicide in India: a complex public health tragedy in need of a plan. *Lancet Public Health* 2018 doi: 10.1016/S2468-2667(18)30142-7 [published Online First: 2018/09/17]
4. Zalsman G, Hawton K, Wasserman D, et al. Suicide prevention strategies revisited: 10-year systematic review. *Lancet Psychiatry* 2016;3(7):646-59. doi: 10.1016/S2215-0366(16)30030-X
5. Turecki G, Brent DA. Suicide and suicidal behaviour. *Lancet* 2016;387(10024):1227-39. doi: 10.1016/S0140-6736(15)00234-2
6. O'Connor R, Pirkis J. The International Handbook of Suicide Prevention. Second Edition ed. United Kingdom: Wile-Blackwell 2016.
7. Niederkrotenthaler T, Voracek M, Herberth A, et al. Role of media reports in completed and prevented suicide: Werther v. Papageno effects. *British Journal of Psychiatry* 2010;197(3):234-43. doi: 10.1192/bjp.bp.109.074633
8. Cheng Q, Chen F, Yip PS. Media effects on suicide methods: A case study on Hong Kong 1998-2005. *PLoS One* 2017;12(4):e0175580. doi: 10.1371/journal.pone.0175580
9. King KE, Schlichthorst M, Spittal MJ, et al. Can a documentary increase help-seeking intentions in men? A randomised controlled trial. *J Epidemiol Community Health* 2018;72(1):92-98. doi: 10.1136/jech-2017-209502 [published Online First: 2017/11/05]
10. Niederkrotenthaler T, Fu KW, Yip PS, et al. Changes in suicide rates following media reports on celebrity suicide: a meta-analysis. *Journal of Epidemiology and Community Health* 2012;66(11):1037-42. doi: 10.1136/jech-2011-200707
11. Chen YY, Chen F, Yip PS. The impact of media reporting of suicide on actual suicides in Taiwan, 2002-05. *J Epidemiol Community Health* 2011;65(10):934-40. doi: 10.1136/jech.2010.117903 [published Online First: 2010/12/08]
12. Kunrath S, Baumert J, Ladwig KH. Increasing railway suicide acts after media coverage of a fatal railway accident? An ecological study of 747 suicidal acts. *J Epidemiol Community Health* 2011;65(9):825-8. doi: 10.1136/jech.2009.098293 [published Online First: 2010/10/22]
13. World Health Organization, International Association for Suicide Prevention. Preventing suicide: a resource for media professionals, update 2017. Geneva: World Health Organization, 2017.
14. Ponnudurai R. Suicide in India - changing trends and challenges ahead. *Indian Journal of Psychiatry* 2015;57(4):348-54. doi: 10.4103/0019-5545.171835
15. Armstrong G, Vijayakumar L, Niederkrotenthaler T, et al. Assessing the quality of media reporting of suicide news in India against World Health Organization guidelines: A content analysis study of nine major newspapers in Tamil Nadu. *Aust N Z J Psychiatry* 2018;52(9):856-63. doi: 10.1177/0004867418772343 [published Online First: 2018/05/05]

16. Shoemaker P, Cohen A. News around the world : content, practitioners, and the public. New York: Routledge 2006.
17. Niederkrotenthaler T, Till B, Herberth A, et al. The gap between suicide characteristics in the print media and in the population. *Eur J Public Health* 2009;19(4):361-4. doi: 10.1093/eurpub/ckp034
18. Chen YY, Yip PS, Tsai CW, et al. Media representation of gender patterns of suicide in Taiwan. *Crisis* 2012;33(3):144-50. doi: 10.1027/0227-5910/a000118
19. Machlin A, Pirkis J, Spittal MJ. Which suicides are reported in the media - and what makes them "newsworthy"? *Crisis* 2013;34(5):305-13. doi: 10.1027/0227-5910/a000177
20. Fu KW, Chan YY, Yip PS. Newspaper reporting of suicides in Hong Kong, Taiwan and Guangzhou: compliance with WHO media guidelines and epidemiological comparisons. *Journal of Epidemiology and Community Health* 2011;65(10):928-33. doi: 10.1136/jech.2009.105650
21. National Crime Records Bureau. Accidental Deaths & Suicides in India: 2015. New Delhi, India: Ministry of Home Affairs, Government of India 2015.
22. Media Research Users Council. Indian Readership Survey 2014. Mumbai, India: Media Research Users Council 2017.
23. Audit Bureau of Circulations. Details of most circulated publications for the audit period January - June 2014. Mumbai, India: Audit Bureau of Circulations 2015.
24. Arya V, Page A, River J, et al. Trends and socio-economic determinants of suicide in India: 2001-2013. *Soc Psychiatry Psychiatr Epidemiol* 2018;53(3):269-78. doi: 10.1007/s00127-017-1466-x [published Online First: 2017/12/07]
25. Bhola P, Manjula M, Rajappa V, et al. Predictors of non-suicidal and suicidal self-injurious behaviours, among adolescents and young adults in urban India. *Asian J Psychiatr* 2017;29:123-28. doi: 10.1016/j.ajp.2017.04.024 [published Online First: 2017/10/25]
26. Chanana K. Hinduism and Female Sexuality: Social Control and Education of Girls in India. *Sociological Bulletin* 2001;50(1):37-63.
27. Mullatti L. Families in India: Beliefs and Realities. *Journal of Comparative Family Studies* 1995;26:11-25.
28. Kposowa AJ. Marital status and suicide in the National Longitudinal Mortality Study. *J Epidemiol Community Health* 2000;54(4):254-61.
29. Latha KS, Bhat SM, D'Souza P. Suicide attempters in a general hospital unit in India: their socio-demographic and clinical profile--emphasis on cross-cultural aspects. *Acta Psychiatr Scand* 1996;94(1):26-30.
30. Srivastava MK, Sahoo RN, Ghotekar LH, et al. Risk factors associated with attempted suicide : a case control study. *Indian J Psychiatry* 2004;46(1):33-8.
31. Mary RA, Marslin G, Franklin G, et al. Test anxiety levels of board exam going students in Tamil Nadu, India. *Biomed Res Int* 2014;2014:578323. doi: 10.1155/2014/578323 [published Online First: 2014/08/22]
32. Kennedy J, King L. The political economy of farmers' suicides in India: indebted cash-crop farmers with marginal landholdings explain state-level variation in suicide rates. *Global Health* 2014;10:16. doi: 10.1186/1744-8603-10-16 [published Online First: 2014/03/29]
33. Munster D. Farmers' Suicides as Public Death: Politics, Agency and Statistics in a Suicide-Prone District (South India). *Modern Asian Studies* 2015;49(5):1580-605.
34. Spicer RS, Miller TR. Suicide acts in 8 states: incidence and case fatality rates by demographics and method. *Am J Public Health* 2000;90(12):1885-91. [published Online First: 2000/12/09]

- 1  
2  
3 35. Vijayakumar L, Jeyaseelan L, Kumar S, et al. A central storage facility to reduce  
4 pesticide suicides--a feasibility study from India. *BMC Public Health* 2013;13:850.  
5 doi: 10.1186/1471-2458-13-850 [published Online First: 2013/09/18]  
6  
7 36. Gunnell D, Ho D, Murray V. Medical management of deliberate drug overdose: a  
8 neglected area for suicide prevention? *Emerg Med J* 2004;21(1):35-8. [published  
9 Online First: 2004/01/22]  
10  
11 37. de Silva VA, Senanayake SM, Dias P, et al. From pesticides to medicinal drugs: time  
12 series analyses of methods of self-harm in Sri Lanka. *Bull World Health Organ*  
13 2012;90(1):40-6. doi: 10.2471/BLT.11.091785 [published Online First: 2012/01/25]  
14  
15 38. Till B, Wild TA, Arendt F, et al. Associations of Tabloid Newspaper Use With  
16 Endorsement of Suicide Myths, Suicide-Related Knowledge, and Stigmatizing  
17 Attitudes Toward Suicidal Individuals. *Crisis* 2018;39(6):428-37. doi: 10.1027/0227-  
18 5910/a000516 [published Online First: 2018/04/06]  
19  
20 39. Jamieson P, Jamieson K.H, Romer D. The Responsible Reporting of Suicide in Print  
21 Journalism. *AMERICAN BEHAVIORAL SCIENTIST* 2002;46(12):1643-60.  
22  
23  
24  
25  
26  
27  
28  
29  
30  
31  
32  
33  
34  
35  
36  
37  
38  
39  
40  
41  
42  
43  
44  
45  
46  
47  
48  
49  
50  
51  
52  
53  
54  
55  
56  
57  
58  
59  
60

1  
2  
3  
4  
5  
6  
7  
8  
9  
10  
11  
12  
13  
14  
15  
16  
17  
18  
19  
20  
21  
22  
23  
24  
25  
26  
27  
28  
29  
30  
31  
32  
33  
34  
35  
36  
37  
38  
39  
40  
41  
42  
43  
44  
45  
46  
47  
48  
49  
50  
51  
52  
53  
54  
55  
56  
57  
58  
59  
60

## Figures

**Figure 1: Comparing the proportion of female decedents in newspaper suicide reports vs. the population suicide statistics for Tamil Nadu**

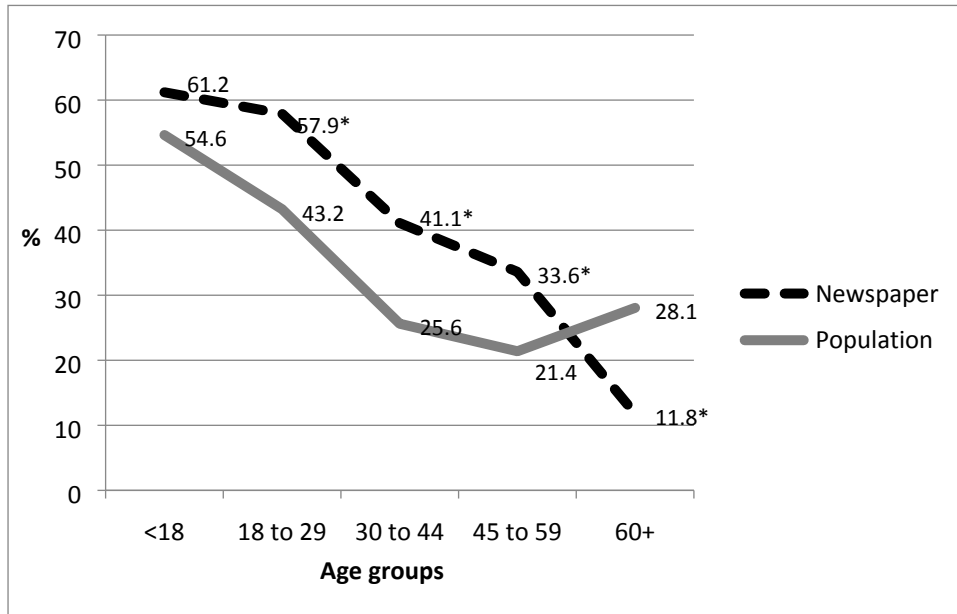

\* <math>p < 0.05</math>, based on two-sided binomial tests within each age group to calculate if the proportion of suicide deceased in the newspaper articles that were female was different to that in the official suicide statistics

**Figure 2: Comparing the proportions of selected occupational groups of suicide decedents in newspaper reports vs. the population suicide statistics for Tamil Nadu**

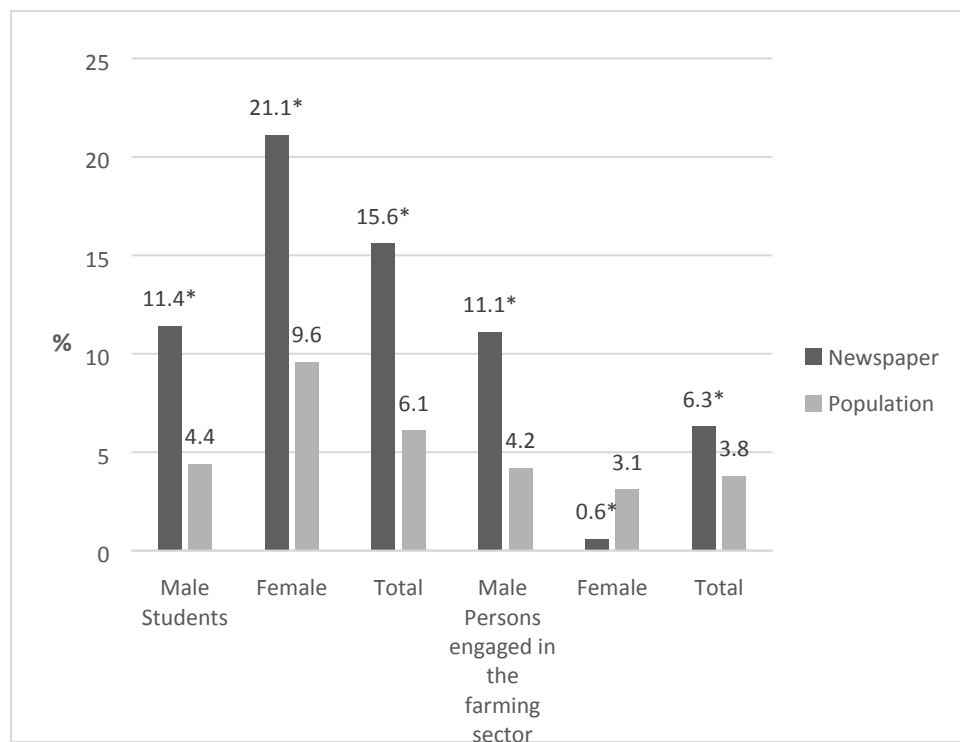

Note: The occupational categories of 'student' and 'persons engaged in the farming sector' were the only categories in the official statistics that were distinct enough to compare to the data we extracted from newspaper reports. Other occupational categories in the official suicide statistics (e.g. 'professionals/salaried persons') were too broad to be reproduced.

\*  $<0.05$ , based on two-sided binomial tests within each age group to calculate if the proportion of suicide deceased in the newspaper articles that were female was different to that in the official suicide statistics

## Tables

**Table 1: Binomial tests comparing the demographic characteristics of suicide decedents in newspaper reports vs. the population suicide statistics for Tamil Nadu**

| Characteristics                   | Male            |                  |                      | Female          |                  |                      | Total           |                  |                      |
|-----------------------------------|-----------------|------------------|----------------------|-----------------|------------------|----------------------|-----------------|------------------|----------------------|
|                                   | Newspaper % (n) | Population % (n) | p-value <sup>a</sup> | Newspaper % (n) | Population % (n) | p-value <sup>a</sup> | Newspaper % (n) | Population % (n) | p-value <sup>a</sup> |
| <b>Age</b>                        |                 |                  |                      |                 |                  |                      |                 |                  |                      |
| <18 years                         | 7.1% (54)       | 4.2% (446)       | <0.001               | 13.0% (85)      | 10.7% (537)      | 0.071                | 9.8% (139)      | 6.2% (983)       | <0.001               |
| 18-29 years                       | 31.5% (239)     | 24.7% (2656)     | <0.001               | 50.2% (328)     | 40.1% (2022)     | <0.001               | 40.1% (567)     | 29.7% (4678)     | <0.001               |
| 30-44 years                       | 26.2% (199)     | 34.9% (3749)     | <0.001               | 21.3% (139)     | 25.6% (1291)     | 0.016                | 23.9% (338)     | 31.9% (5040)     | <0.001               |
| 45-59 years                       | 23.4% (178)     | 25.5% (2742)     | 0.194                | 13.8% (90)      | 14.8% (746)      | 0.481                | 19.0% (268)     | 22.1% (3488)     | 0.006                |
| 60+ years                         | 11.8% (90)      | 10.6% (1141)     | 0.296                | 1.8% (12)       | 8.8% (445)       | <0.001               | 7.2% (102)      | 10.1% (1586)     | 0.001                |
| Total                             | 100.0% (760)    | 100.0% (10734)   |                      | 100.0% (654)    | 100.0% (5041)    |                      | 100.0% (1,414)  | 100.0% (15775)   |                      |
| <b>Marital status<sup>b</sup></b> |                 |                  |                      |                 |                  |                      |                 |                  |                      |
| Unmarried                         | 26.8% (125)     | 23.5% (2459)     | 0.096                | 34.5% (180)     | 22.3% (1100)     | <0.001               | 30.9% (305)     | 23.1% (3559)     | <0.001               |
| Married                           | 63.6% (297)     | 73.4% (7682)     | <0.001               | 60.8% (317)     | 72.1% (3556)     | <0.001               | 62.1% (614)     | 73.0% (11238)    | <0.001               |
| Separated                         | 5.6% (26)       | 1.2% (128)       | <0.001               | 1.2% (6)        | 3.1% (155)       | <0.001               | 3.2% (32)       | 1.8% (283)       | <0.001               |
| Divorced                          | 0.0% (0)        | 0.3% (21)        | 0.236                | 0.4% (2)        | 0.8% (38)        | 0.286                | 0.2% (2)        | 0.4% (69)        | 0.325                |
| Widowed                           | 4.1% (19)       | 1.6% (164)       | <0.001               | 3.1% (16)       | 1.6% (80)        | 0.008                | 3.5% (35)       | 1.6% (244)       | <0.001               |
| Total                             | 100.0% (467)    | 100.0% (10464)   |                      | 100.0% (521)    | 100.0% (4929)    |                      | 100.0% (988)    | 100.0% (15393)   |                      |
| <b>Suicide method</b>             |                 |                  |                      |                 |                  |                      |                 |                  |                      |
| Hanging                           | 52.7% (436)     | 42.5% (4555)     | <0.001               | 51.2% (349)     | 38.0% (1916)     | <0.001               | 52.1% (785)     | 41.0% (6471)     | <0.001               |
| Poisoning                         | 20.3% (168)     | 39.7% (4260)     | <0.001               | 19.8% (135)     | 35.2% (1775)     | <0.001               | 20.1% (303)     | 38.3% (6035)     | <0.001               |
| Fire/self-immolation              | 9.3% (77)       | 6.0% (643)       | 0.001                | 12.0% (82)      | 19.2% (967)      | <0.001               | 10.5% (159)     | 10.2% (1610)     | 0.659                |
| Under vehicle/train               | 4.5% (37)       | 2.9% (309)       | 0.007                | 3.8% (26)       | 0.9% (45)        | <0.001               | 4.2% (63)       | 2.2% (354)       | <0.001               |
| Drowning                          | 3.0% (25)       | 3.3% (357)       | 0.656                | 4.7% (32)       | 3.4% (171)       | 0.061                | 3.8% (57)       | 3.3% (528)       | 0.297                |
| Jumping (off structure)           | 2.5% (21)       | 0.6% (60)        | <0.001               | 4.1% (28)       | 0.1% (7)         | <0.001               | 3.2% (49)       | 0.4% (67)        | <0.001               |
| Self-inflicted injury             | 0.7% (6)        | 0.6% (68)        | 0.642                | 2.3% (16)       | 0.4% (18)        | <0.001               | 1.5% (22)       | 0.5% (86)        | <0.001               |
| Other                             | 6.9% (57)       | 4.5% (482)       | 0.001                | 1.9% (13)       | 2.8% (142)       | 0.159                | 4.6% (70)       | 4.0% (624)       | 0.203                |
| Total                             | 100.0% (827)    | 100.0% (10734)   |                      | 100.0% (681)    | 100.0% (5041)    |                      | 100.0% (1508)   | 100.0% (15775)   |                      |

<sup>a</sup> Two-tailed binomial test on difference between two proportions using the “prtesti” command in Stata

<sup>b</sup> Excludes those listed as ‘unknown’ and ‘other’ in the NCRB data



1  
2  
3  
4  
5  
6  
7  
8  
9  
10  
11  
12  
13  
14  
15  
16  
17  
18  
19  
20  
21  
22  
23  
24  
25  
26  
27  
28  
29  
30  
31  
32  
33  
34  
35  
36  
37  
38  
39  
40  
41  
42  
43  
44  
45  
46

For peer review only

# BMJ Open

## Mass media representation of suicide in a high suicide state in India: an epidemiological comparison with suicide deaths in the population

|                                 |                                                                                                                                                                                                                                                                                                                                                                                                                                                                                                                                                                                                                                                                                                                                                                                                                           |
|---------------------------------|---------------------------------------------------------------------------------------------------------------------------------------------------------------------------------------------------------------------------------------------------------------------------------------------------------------------------------------------------------------------------------------------------------------------------------------------------------------------------------------------------------------------------------------------------------------------------------------------------------------------------------------------------------------------------------------------------------------------------------------------------------------------------------------------------------------------------|
| Journal:                        | <i>BMJ Open</i>                                                                                                                                                                                                                                                                                                                                                                                                                                                                                                                                                                                                                                                                                                                                                                                                           |
| Manuscript ID                   | bmjopen-2019-030836.R1                                                                                                                                                                                                                                                                                                                                                                                                                                                                                                                                                                                                                                                                                                                                                                                                    |
| Article Type:                   | Research                                                                                                                                                                                                                                                                                                                                                                                                                                                                                                                                                                                                                                                                                                                                                                                                                  |
| Date Submitted by the Author:   | 23-May-2019                                                                                                                                                                                                                                                                                                                                                                                                                                                                                                                                                                                                                                                                                                                                                                                                               |
| Complete List of Authors:       | Armstrong, Gregory; The University of Melbourne, Nossal Institute for Global Health, Melbourne School of Population and Global Health, Vijayakumar , Lakshmi ; Voluntary Health Services Hospital, Department of Psychiatry<br>Pirkis, Jane; University of Melbourne, Centre for Mental Health, Melbourne School of Population Health<br>Jayaseelan, Mala; Voluntary Health Services Hospital, Department of Psychiatry<br>Cherian, Anish; National Institute of Mental Health and Neuro Sciences, Department of Psychiatric Social Work<br>Soerensen, Jane; Kobenhavns Universitet, Department of Public Health<br>Arya, Vikas; Translational Health Research Institute (THRI)<br>Niederkrötenhaller, Thomas; Medical University of Vienna, Center for Public Health, Department of General Practice and Family Medicine |
| <b>Primary Subject Heading</b>: | Mental health                                                                                                                                                                                                                                                                                                                                                                                                                                                                                                                                                                                                                                                                                                                                                                                                             |
| Secondary Subject Heading:      | Global health, Epidemiology                                                                                                                                                                                                                                                                                                                                                                                                                                                                                                                                                                                                                                                                                                                                                                                               |
| Keywords:                       | Suicide & self-harm < PSYCHIATRY, MENTAL HEALTH, JOURNALISM (see Medical Journalism)                                                                                                                                                                                                                                                                                                                                                                                                                                                                                                                                                                                                                                                                                                                                      |
|                                 |                                                                                                                                                                                                                                                                                                                                                                                                                                                                                                                                                                                                                                                                                                                                                                                                                           |

SCHOLARONE™  
Manuscripts

# Mass media representation of suicide in a high suicide state in India: an epidemiological comparison with suicide deaths in the population

Gregory Armstrong<sup>1\*</sup>, Lakshmi Vijayakumar<sup>2,3</sup>, Jane Pirkis<sup>4</sup>, Mala Jayaseelan<sup>2</sup>, Anish Cherian<sup>5</sup>, Jane Brandt Sørensen<sup>6</sup>, Vikas Arya<sup>7</sup>, Thomas Niederkrotenthaler<sup>8</sup>

<sup>1</sup> Nossal Institute for Global Health, The University of Melbourne, Melbourne, Australia

<sup>2</sup> Department of Psychiatry, Voluntary Health Services, Chennai, India

<sup>3</sup> SNEHA Suicide Prevention Centre, Chennai, India

<sup>4</sup> Centre for Mental Health, The University of Melbourne, Melbourne, Australia

<sup>5</sup> Department of Psychiatric Social Work, National Institute of Mental Health and Neurosciences, Bengaluru, India.

<sup>6</sup> Department of Public Health, University of Copenhagen, Denmark

<sup>7</sup> Translational Health Research Institute, The University of Western Sydney, Sydney, Australia

<sup>8</sup> Centre for Public Health, Medical University of Vienna, Vienna, Austria

Corresponding author:

Gregory Armstrong, Nossal Institute for Global Health, Melbourne School of Population and Global Health, University of Melbourne, 333 Exhibition St, Melbourne, Victoria 3010, Australia. Email: [g.armstrong@unimelb.edu.au](mailto:g.armstrong@unimelb.edu.au)

## Abstract

### Objectives:

Suicide rates in India are among the highest in the world, equating to over 200,000 suicides annually. Reports of suicides are a routine feature in major newspapers in India, and reporters may selectively present “newsworthy” suicide stories. The aim of this paper was to systematically investigate whether mass media reports of suicides reflect the epidemiological data on suicide in a high suicide state in India.

### Design:

We undertook a content analysis study to extract socio-demographic data on suicides reported among nine of the most highly read daily newspapers in the high suicide southern state of Tamil Nadu between June–December 2016. A total of 1,258 newspaper articles were retrieved containing reports on 1,631 suicides. Two-tailed binomial tests on aggregate frequencies assessed whether the socio-demographic characteristics of suicides in the newspaper articles were different to the population suicide statistics for Tamil Nadu.

### Results:

We identified some statistically significant discrepancies between suicide characteristics in the population and the media. Suicides involving females, those aged under 29 years, separated or widowed males, unmarried females, those using methods with a higher case-

1  
2  
3 fatality rate, and those who were students or working in the agricultural sector were  
4 significantly over-reported relative to their occurrence in the broader population.  
5  
6

### 7 **Conclusions:**

8 The suicide characteristics in the print media were not entirely representative of suicides in  
9 the broader Tamil Nadu population, which may lead the general public to develop  
10 misunderstandings about suicide in their state. The discrepancies we identified will inform  
11 tailored suicide prevention education for media professionals.  
12  
13  
14  
15

### 16 **Strengths and limitations of this study**

- 17 • Suicides are a routine feature in major newspapers in India, and this is the first study  
18 to examine whether these media reports of suicides reflect the epidemiological data  
19 on suicide in India.
- 20 • We followed nine major newspapers over seven months and collected a large sample  
21 of 1,631 media reports of suicides.
- 22 • We only looked at printed newspapers and further funding it would be desirable to  
23 examine media reports by other forms of mass and social media.
- 24 • A large proportion of suicides are not captured in the official suicide statistics in  
25 India, due to a sole reliance on police data and the lack of a comprehensive and  
26 reliable vital registration system. Given both the official statistics and the media  
27 reports used in this study are based on police reports of suicide, we expect that this  
28 will have a negligible effect on the comparisons made in our study.
- 29 • While our findings provide some epidemiological clues as to the decisions made by  
30 media professionals in choosing whether to report on a suicide, further qualitative  
31 research with media professionals is required to better understand the decision-  
32 making process and any biases that may be involved.  
33  
34  
35  
36  
37  
38  
39  
40  
41  
42  
43  
44  
45  
46  
47  
48  
49  
50  
51  
52  
53  
54  
55  
56  
57  
58  
59  
60

## Background

Southeast Asia accounts for roughly 40% of the estimated 800,000 suicides that occur each year globally<sup>1</sup>. Suicide rates in India are among the highest in the world with the most recent suicide death rate estimates ranging between 18-21 deaths per 100,000 population (*c.f.* the global average of 11/100,000). This equates to an estimated 230,000-250,000 suicide deaths annually with far-reaching social, emotional and economic consequences<sup>1,2</sup>. A public health approach to suicide is gaining momentum in India with calls for the development of national and state-level suicide prevention strategies, including the development of media guidelines to improve mass and social media coverage of suicides<sup>3</sup>.

One of the few recommended suicide prevention strategies at the population level is responsible media reporting of suicides<sup>4-6</sup>, based on evidence around copycat suicides, dissemination of suicide methods and behaviours, and the imperative to deliver tailored suicide prevention messaging in media content<sup>7-12</sup>. Consequently, the World Health Organization (WHO) recommends that public health specialists should engage with media professionals to limit irresponsible media coverage (for example, reports that sensationalise suicide) and to promote coverage that educates the public about suicide<sup>13</sup>.

The manner by which the mass media communicates with the Indian public on the topic of suicide in India has thus far gone without sufficient inquiry<sup>14</sup>. Our own recent research into print media portrayals of suicide in India observed that explicit suicide reports are a routine feature, and that potentially harmful reporting practices are common<sup>15</sup>. For example, a detailed suicide method was reported in 43.3% of articles. Given that there are few alternative sources of publicly-disseminated information on suicide in India, as the suicide prevention sector is relatively under-resourced, these mass media portrayals of suicide are quite possibly playing a critical role in shaping and reflecting public attitudes and behaviours in relation to suicide.

Researchers have long recognised the disparity between the epidemiological data on suicide in the population and the stories selectively presented for mass media reports<sup>16</sup>. In suicide prevention, there is a major focus on disseminating knowledge on the risk factors and the complex multilayered context for suicide<sup>6</sup>. This can be at odds with media preferences for newsworthy stories that are atypical or that play to broader social narratives of interest to readers. Hence, one important area of enquiry for suicide prevention is to better understand what kinds of suicides media broadcast to the public, to shed light on possible misunderstandings of the epidemiological realities that can inform media training and engagement strategies. Very few studies have examined which suicides tend to feature in the media. Those that have, found that the mass media selectively present newsworthy suicide stories that do not reflect the broader array of suicides in the population<sup>17-20</sup>, which can carry profound implications for the social and political responses to suicide.

This phenomenon is yet to be studied in India. This paper seeks to address this gap in the literature by comparing the characteristics of suicides in print media reports in India against the characteristics of suicides in the population. Due to the large number of languages across India and the prohibitive level of resources required to fund a study with a broad national spread of newspapers published in a range of languages, we elected to undertake a comprehensive study of newspaper reporting in one state. We chose the southern state of Tamil Nadu (population = 72 million), which consistently has one of the highest suicide rates

1  
2  
3 in India (22.8/100,000) equating to 15,777 recorded suicides in 2015, over 40 suicides per  
4 day<sup>21</sup>. The approach of focusing on one state allows us to comprehensively track changes in  
5 media reporting in this state following upcoming efforts to engage with the media on this  
6 topic.  
7

## 8 9 **Methods**

10 As part of the Suicide in the Indian Media (SIM) project <sup>15</sup>, we undertook a content analysis  
11 study of articles reporting suicide-related news in nine of the ten most highly read vernacular  
12 and English-language daily newspapers in Tamil Nadu over the 7-month period between 1<sup>st</sup>  
13 June and 31<sup>st</sup> December 2016. The nine newspapers collectively have an estimated average  
14 daily readership of over 16,000,000 people in Tamil Nadu alone <sup>22</sup>. Five of the nine  
15 newspapers under review are in the top 20 most circulated daily newspapers in the country <sup>23</sup>,  
16 giving the findings relevance beyond Tamil Nadu. We previously published research from  
17 this content analysis study where we assessed the quality of newspaper reporting of suicide-  
18 related news against World Health Organization suicide reporting guidelines <sup>13 15</sup>.  
19

20  
21 To source the articles, the hardcopies of all 1,926 (9 newspapers x 214 days) editions of the  
22 nine newspapers during the study period were hand searched by three trained research  
23 assistants (psychologists), allowing us to include several newspapers that did not have a  
24 strong online presence. Our search yielded 1,258 articles containing reports on 1,631  
25 suicides; the vast majority of these suicides were of people from Tamil Nadu (84.0%,  
26 n=1371), while the remainder were largely of people from elsewhere in India (14.5%, n=236)  
27 or from other countries (1.1%, n=18), with location unable to be determined in 0.4% (n=6) of  
28 the media reports. We elected to retain all suicides in our primary analyses, regardless of the  
29 location of the deceased, as these reports will still influence the public's impressions of who  
30 is affected by suicide; secondary analyses will exclusively examine suicides of people from  
31 Tamil Nadu. We excluded articles where suicide was only mentioned briefly (i.e. <50% of the  
32 article) and articles with a focus on terrorist-related suicide bombings or euthanasia.  
33  
34

35  
36 A bi-lingual psychologist and researcher (MPsych, MPhil) extracted data on gender, age,  
37 marital status, suicide method and occupational status for each suicide. We compared the data  
38 extracted from the newspaper articles with the characteristics of suicides in the Tamil Nadu  
39 population suicide statistics found in the Accidental Death & Suicides in India report for  
40 2015 published by the National Crime Records Bureau (NCRB) <sup>21</sup>.  
41  
42

43 Comparing occupational status between the two data sets was complicated by the use of  
44 broad category descriptors in the NCRB data (for example, 'professionals/salaried persons')  
45 that were not possible to reproduce. However, there were two occupational categories that  
46 were distinct enough to legitimately reproduce and examine; 'students' and 'persons engaged  
47 in the farming sector'. Both are occupational groups that have been of significant interest to  
48 suicide prevention in India and would resonate strongly with the public when discussing the  
49 topic of suicide <sup>24 25</sup>.  
50  
51

52  
53 We disaggregated the data by gender, and in doing so we excluded suicides of *Hijra* and  
54 transgender people due to the very small numbers of such cases; there were 13 reports of  
55 suicide deceased who were Hijra/transgender in the newspaper articles and 2 such suicide  
56 deceased in the official suicide records for Tamil Nadu.  
57

58 Two-tailed binomial tests on aggregate frequencies were used in Stata (command "prtesti") to  
59 assess whether the distribution of the characteristics of suicides in the newspaper articles was  
60

1  
2  
3 different to their distribution in the population suicide statistics for Tamil Nadu. This analysis  
4 approach has been used previously by a similar media study in Austria<sup>17</sup>. Not all media  
5 reports contained data on all the variables we analysed, so percentages were calculated based  
6 on data for those individuals for whom these characteristics were reported in the article.  
7

## 8 9 **Results**

10 Binomial tests showed that female suicides were over-reported relative to their occurrence in  
11 the broader population of suicides, comprising 45.3% (729/1610) of suicides in newspaper  
12 reports compared to 32.0% (n=5041/15775) of suicides in the official suicide statistics  
13 (p<0.001) (see Figure 1). While newspapers covered a significantly higher percentage of  
14 female suicides, this was not the case across all age groups. There was no statistically  
15 significant difference in the <18 years age group, and we observed the reverse pattern in the  
16 60+ years age group, such that female suicides were significantly under-reported.  
17

18  
19 Binomial tests showed that the suicides of those aged less than 29 years were over-reported  
20 relative to their occurrence in the broader population (see Table 1). Conversely, the suicides  
21 of those aged 30 years or older were under-reported. The suicides of those who were  
22 unmarried, separated and widowed were over-reported, while the suicides of those who were  
23 married were under-reported. The gender stratification of these marital status results  
24 highlighted a gender-based difference. Suicides among separated and widowed males were  
25 over-reported while it was the suicides of unmarried females that were over-reported; the  
26 suicides of those who were married were under-reported in both males and females.  
27

28  
29 The suicides of students and those engaged in the farming sector were over-reported relative  
30 to their occurrence in the broader population (see Figure 2). Students comprised 15.6%  
31 (255/1631) of all suicides in newspaper reports compared to 6.1% (955/15775) of suicides in  
32 the official suicide statistics (p<0.001). People engaged in the farming sector comprised 6.3%  
33 (102/1631) of all suicides in newspaper reports compared to 3.8% (606/15775) of suicides in  
34 the official suicide statistics (p<0.001). Conversely, the suicides of females in the agricultural  
35 sector were under-represented in media reports.  
36

37  
38 Deaths involving hanging, coming under vehicle/train, jumping off building/structure and  
39 self-inflicted injury such as a knife wound were over-reported, while suicides by poisoning  
40 were under-reported (see Table 1).  
41

42  
43 Secondary analyses were undertaken, only including media reports of suicides of people from  
44 Tamil Nadu, to examine if our findings were confounded by media reports of suicides of  
45 people from outside Tamil Nadu. The results are consistent with the primary analyses (See  
46 Supplementary File 1).  
47

## 48 49 **Discussion**

50 The present study identified substantial disparities between suicide characteristics in the  
51 population and the media. Suicides involving females, those aged under 29 years, separated  
52 or widowed males, unmarried females, and those using lethal methods (other than pesticides)  
53 were significantly over-reported relative to their occurrence in the broader population. The  
54 suicides of people from the occupational groups of students or persons engaged in the  
55 agricultural sector were also over-reported.  
56

57  
58 An important finding was that female suicides were significantly over-represented, relative to  
59 their occurrence in the population. This finding appears to be unique to India and is in stark  
60

1  
2  
3 contrast to what has been observed elsewhere. No under or over-reporting was observed in  
4 Australia<sup>19</sup> or Austria<sup>17</sup> based on gender. However, in the Chinese settings of Guangzhou  
5 and Taiwan, female suicides have been observed to be under-reported<sup>20</sup>, the opposite pattern  
6 to our findings. The authors posited that, in traditional Chinese societies, women can be  
7 stereotyped as being more emotional or hysterical, and more prone to suicide. Such that, they  
8 felt media professionals may perceive the suicide deaths of men to be more unusual and thus  
9 newsworthy.  
10  
11

12 In India, the female suicide rate is among the highest in the world, and is nearly three times  
13 higher than the rate expected globally for countries at similar levels of Socio-Demographic  
14 Index<sup>2</sup>. This well-documented fact about suicide in India could possibly permeate the minds  
15 of media professionals, who may then give greater emphasis to the plight of females who  
16 take their lives. Notwithstanding this, it is also likely that there are some other reasons media  
17 professionals decide that the suicides of females are more newsworthy. Based on our  
18 anecdotal conversations with media professionals, we speculate that female suicides may also  
19 be perceived by media professionals to generate a greater empathic response among readers  
20 of newspapers in India. Stories of the suicides of females may align with paternalistic  
21 narratives about the risks to women in Indian society and the family and collective  
22 responsibility to protect them<sup>26</sup>.  
23  
24  
25

26 We also observed an under-reporting of suicides of married males and females. Moreover, we  
27 observed that, among female suicides, there was an over-reporting of suicides among those  
28 who were unmarried. This was quite distinct from what was observed among male suicides,  
29 where suicides by separated or widowed males were over-reported in the newspapers. It is  
30 unclear why there is an apparent media preference for stories of unmarried females and  
31 separated or widowed males, nor what cultural scripts or narratives this may align with.  
32 Marriage and family are at the core of the social fabric in India<sup>27</sup>, and family is the main  
33 source of welfare protections. We speculate that risks associated with being outside of the  
34 institution of marriage may be being emphasised by media professionals through their  
35 selection of suicide stories pertaining to people whose marriage has been lost or who are yet  
36 to enter marriage. Through this under-reporting of suicides of married people, these media  
37 reports may actually be giving an incorrect signal to the population with regard to any suicide  
38 prevention protections that may be assumed to be gained from being married. It is important  
39 to note that while marriage is typically understood to protect against suicide, particularly for  
40 men, based on findings from studies in Western settings<sup>28</sup>, this is not the case in India.  
41 Research undertaken in India yields mixed findings regarding the relationship between  
42 marital status and suicide for both men and women, suggesting that either marriage is not a  
43 protective factor for suicide, or indeed that the risk of suicide is higher among those who are  
44 married<sup>29 30</sup>. This epidemiological reality regarding marriage and suicide may conflict with  
45 narratives in India that locate 'the family' as the main source of social protections. Clearly  
46 this is speculation, and so qualitative research with media professionals is required to better  
47 understand the phenomenon of the influential role of gender and marital status in the  
48 perceived newsworthiness of suicide deaths. We note though, that even such qualitative  
49 interviews may find it hard to unravel what may be unconscious and deeply culturally  
50 embedded biases among media professionals.  
51  
52  
53  
54  
55

56 Our findings suggest that the suicides of younger persons aged <29 years were considered to  
57 be more newsworthy than the suicide deaths of persons aged 30 years and older. This finding  
58 is largely consistent with research from Australia<sup>19</sup>, Austria<sup>17</sup> and China<sup>20</sup>. It has been  
59 posited that youth suicides may be considered more newsworthy; that is, the death of a youth  
60



1  
2  
3 with their life ahead of them carries a sensational undertone that may grab the reader's  
4 attention<sup>20</sup>. Suicide is also the leading cause of death among youth in India aged 15-29 years,  
5 and greater than 70% of female suicide deaths and 50% of male suicide deaths are in this age  
6 group<sup>2</sup>. Thus, it is possible that media professionals may be attempting to give such suicide  
7 deaths greater emphasis without being aware that they may in turn be overlooking the issue  
8 of suicide among older aged people, also a high-risk period for both males and females in  
9 India<sup>2</sup>.  
10  
11

12 Our findings also revealed that the suicides of students and people engaged in the agricultural  
13 sector were significantly over-represented, relative to their occurrence in the population. This  
14 finding was not surprising, given that both occupational groups are of significant interest to  
15 the public discourse and narratives around suicide in India<sup>24 25</sup>. Media houses would be  
16 aware that reports on such deaths would resonate strongly with readers. Student suicides are a  
17 major and topical policy issue in India, frequently located within discussions around the  
18 fierce competition for student places and an accompanying intensity of exam pressure<sup>31</sup>.  
19 Reporting on this issue will likely be of great interest to parents, who may carry a level of  
20 fear around this happening to their own children. Farmer suicides are highly politicised in  
21 India, and have been the subject of numerous government commissions and policy dialogues.  
22 This has largely been with a focus on issues around the high levels of indebtedness among  
23 farmers, a decline in secure institutional credit, water scarcity, trade liberalisation, and a  
24 considerable vulnerability to "crop failure"<sup>32</sup>. Farmer suicide deaths have been described as  
25 "public deaths", due to the perception that they receive sensational coverage by the mass  
26 media<sup>33</sup>.  
27  
28  
29

30 Finally, suicides by particular methods also appeared to attract more media attention. Deaths  
31 involving hanging, jumping, and coming under vehicle/train were over-represented in media  
32 reports, while suicides by poisoning were under-represented. One interpretation of this  
33 finding is that media may be attracted to reporting on suicides using methods with a higher  
34 degree of lethality, given that these have been observed to have a high case fatality rate<sup>34</sup>.  
35 Deaths involving self-inflicted injuries (e.g. knife wound) were also over-reported, even  
36 though this method does not have a high case fatality rate, indicating that newspaper reporters  
37 may also have an interest in particular suicide methods where it is easy for them to construct  
38 a graphic visual that may attract the attention of the reader. The under-reporting of poisoning  
39 suicide deaths is also an interesting finding. While the ingestion of medical drugs typically  
40 has a low case fatality rate<sup>34</sup>, the ingestion of pesticides, a common suicide method in India  
41 and elsewhere in South Asia<sup>35</sup>, has a high case fatality rate and is a major contributor to high  
42 suicide rates in this region<sup>36 37</sup>.  
43  
44  
45

46 These findings have important implications for suicide prevention. While the mass media are  
47 a powerful resource for educating the public about suicide, the general public may develop  
48 misunderstandings about suicide that are caused by media misrepresentations. For example,  
49 Till et al observed that the consumption of tabloid newspapers in Austria for daily  
50 information appeared to be an independent factor in the endorsement of misconceptions and  
51 myths about suicide<sup>38</sup>. While we didn't assess the articles for suicide myths, we did observe  
52 substantial disparities between suicide characteristics in the population and the media. Strong  
53 biases towards reporting particular types of suicide deaths may result in social and political  
54 responses to suicide that are not based on the epidemiological data. For instance, if media  
55 reports are overly biased towards the coverage of female suicides, youth suicides, suicides  
56 among particular occupational groups, or particularly graphic or more lethal suicide methods,  
57 this may inadvertently affect suicide prevention funding allocations, public perceptions about  
58  
59  
60

1  
2  
3 who is most at risk of suicide and the method they may use, among other possible  
4 consequences.  
5

6  
7 The study has several limitations that are worth noting. Firstly, we compared data from media  
8 reports collected in 2016 against the official suicide statistics for 2015. While these are two  
9 different time periods, it is the most recently available suicide statistics for India and we  
10 expect a high degree of stability between the 2015 and 2016 data. We compared the official  
11 suicide statistics for 2015 against that for 2014 and 2013 and we observed a high degree of  
12 stability in the data; for example, the suicide rate for Tamil Nadu was 22.8 in 2015 and 23.4  
13 in 2014, and 29.7% and 30.7% of suicide deaths were people aged 18-29 in 2015 and 2013  
14 respectively. Secondly, there is a high level of under-reporting of suicide in India. Given both  
15 the official statistics and the media reports are based on police reports of suicide, we expect  
16 that this will have a negligible effect on the comparisons made in our study. Thirdly, while  
17 our findings provide some clues as to the decisions made by media professionals in choosing  
18 whether to report on a suicide, we cannot speak definitively about the decision-making  
19 process and any biases that may be involved. We are currently undertaking qualitative  
20 research with media professionals to better understand this phenomenon<sup>39</sup>. Fourthly, we  
21 were only able to examine the over or under-representation of two occupational categories  
22 that we could meaningfully reproduce. There are several additional occupational categories  
23 that would have been interesting to examine; for example, “housewives” comprised 53% of  
24 female suicide deaths in the 2015 official suicide statistics, yet this occupational information  
25 or the specific term was rarely communicated in media reports. Finally, we only examined  
26 newspaper reports in one southern state of India, and it would have been desirable to examine  
27 reports in other states and reports in other forms of mass and social media.  
28  
29  
30

### 31 **Conclusion**

32  
33 The suicide characteristics in the print media in Tamil Nadu were not representative of  
34 suicides in the broader population, indicating that a skewed picture of reality is being  
35 presented to the community. In particular, suicides involving females, those aged under 29  
36 years, separated or widowed males, unmarried females, those using methods with a higher  
37 case-fatality rate, and those who were students or working in the agricultural sector were  
38 significantly over-reported relative to their occurrence in the broader population. The  
39 discrepancies we identified will inform tailored suicide prevention education for media  
40 professionals.  
41  
42

### 43 **Contributors**

44  
45 GA designed the study, supervised the data collection, and led the data analyses and drafting  
46 of the manuscript. LV and TN supported the design of the study. MJ implemented data  
47 collection. LV, JP, MJ, AC, JBS, VA and TN all contributed to the data analysis plan,  
48 interpretation of the results and the development of the final manuscript.  
49

### 50 **Acknowledgements**

51  
52 We thank Ms Asha Ramia Veeraraghavachary, Mrs Thangaraj Fathima Roseline and Ms  
53 Nivetha Vincent from Voluntary Health Services in Chennai for their thorough work in hand  
54 searching the nine newspapers for the relevant articles for this study.  
55

### 56 **Competing interests**

57  
58 None declared.  
59  
60

### **Patient and public involvement**

This study did not involve patients.

### **Ethics approval**

The data used in this study are from publicly available documents. Nonetheless, we obtained ethics approvals from the Human Ethics Advisory Group at The University of Melbourne in Australia (ID: 1646245.1).

### **Funding**

The lead author is funded by an Early Career Fellowship from the National Health and Medical Research Council in Australia (GNT1138096). This study was funded by Early Career Researcher Awards from The Society for Mental Health Research and The University of Melbourne.

### **Data sharing**

The data used in this study are publicly available media reports and publicly available official reports on suicides in India. Anyone interested in accessing our database on media reports of suicides may contact the corresponding author.

## References

1. World Health Organization. Preventing suicide: A global imperative. Geneva: World Health Organization 2014.
2. India State-Level Disease Burden Initiative Suicide Collaborators. Gender differentials and state variations in suicide deaths in India: the Global Burden of Disease Study 1990-2016. *Lancet Public Health* 2018;3(10):e478-e89. doi: 10.1016/S2468-2667(18)30138-5 [published Online First: 2018/09/17]
3. Armstrong G, Vijayakumar L. Suicide in India: a complex public health tragedy in need of a plan. *Lancet Public Health* 2018 doi: 10.1016/S2468-2667(18)30142-7 [published Online First: 2018/09/17]
4. Zalsman G, Hawton K, Wasserman D, et al. Suicide prevention strategies revisited: 10-year systematic review. *Lancet Psychiatry* 2016;3(7):646-59. doi: 10.1016/S2215-0366(16)30030-X
5. Turecki G, Brent DA. Suicide and suicidal behaviour. *Lancet* 2016;387(10024):1227-39. doi: 10.1016/S0140-6736(15)00234-2
6. O'Connor R, Pirkis J. The International Handbook of Suicide Prevention. Second Edition ed. United Kingdom: Wile-Blackwell 2016.
7. Niederkrotenthaler T, Voracek M, Herberth A, et al. Role of media reports in completed and prevented suicide: Werther v. Papageno effects. *British Journal of Psychiatry* 2010;197(3):234-43. doi: 10.1192/bjp.bp.109.074633
8. Cheng Q, Chen F, Yip PS. Media effects on suicide methods: A case study on Hong Kong 1998-2005. *PLoS One* 2017;12(4):e0175580. doi: 10.1371/journal.pone.0175580
9. King KE, Schlichthorst M, Spittal MJ, et al. Can a documentary increase help-seeking intentions in men? A randomised controlled trial. *J Epidemiol Community Health* 2018;72(1):92-98. doi: 10.1136/jech-2017-209502 [published Online First: 2017/11/05]
10. Niederkrotenthaler T, Fu KW, Yip PS, et al. Changes in suicide rates following media reports on celebrity suicide: a meta-analysis. *Journal of Epidemiology and Community Health* 2012;66(11):1037-42. doi: 10.1136/jech-2011-200707
11. Chen YY, Chen F, Yip PS. The impact of media reporting of suicide on actual suicides in Taiwan, 2002-05. *J Epidemiol Community Health* 2011;65(10):934-40. doi: 10.1136/jech.2010.117903 [published Online First: 2010/12/08]
12. Kunrath S, Baumert J, Ladwig KH. Increasing railway suicide acts after media coverage of a fatal railway accident? An ecological study of 747 suicidal acts. *J Epidemiol Community Health* 2011;65(9):825-8. doi: 10.1136/jech.2009.098293 [published Online First: 2010/10/22]
13. World Health Organization, International Association for Suicide Prevention. Preventing suicide: a resource for media professionals, update 2017. Geneva: World Health Organization, 2017.
14. Ponnudurai R. Suicide in India - changing trends and challenges ahead. *Indian Journal of Psychiatry* 2015;57(4):348-54. doi: 10.4103/0019-5545.171835
15. Armstrong G, Vijayakumar L, Niederkrotenthaler T, et al. Assessing the quality of media reporting of suicide news in India against World Health Organization guidelines: A content analysis study of nine major newspapers in Tamil Nadu. *Aust N Z J Psychiatry* 2018;52(9):856-63. doi: 10.1177/0004867418772343 [published Online First: 2018/05/05]

16. Shoemaker P, Cohen A. News around the world : content, practitioners, and the public. New York: Routledge 2006.
17. Niederkrotenthaler T, Till B, Herberth A, et al. The gap between suicide characteristics in the print media and in the population. *Eur J Public Health* 2009;19(4):361-4. doi: 10.1093/eurpub/ckp034
18. Chen YY, Yip PS, Tsai CW, et al. Media representation of gender patterns of suicide in Taiwan. *Crisis* 2012;33(3):144-50. doi: 10.1027/0227-5910/a000118
19. Machlin A, Pirkis J, Spittal MJ. Which suicides are reported in the media - and what makes them "newsworthy"? *Crisis* 2013;34(5):305-13. doi: 10.1027/0227-5910/a000177
20. Fu KW, Chan YY, Yip PS. Newspaper reporting of suicides in Hong Kong, Taiwan and Guangzhou: compliance with WHO media guidelines and epidemiological comparisons. *Journal of Epidemiology and Community Health* 2011;65(10):928-33. doi: 10.1136/jech.2009.105650
21. National Crime Records Bureau. Accidental Deaths & Suicides in India: 2015. New Delhi, India: Ministry of Home Affairs, Government of India 2015.
22. Media Research Users Council. Indian Readership Survey 2014. Mumbai, India: Media Research Users Council 2017.
23. Audit Bureau of Circulations. Details of most circulated publications for the audit period January - June 2014. Mumbai, India: Audit Bureau of Circulations 2015.
24. Arya V, Page A, River J, et al. Trends and socio-economic determinants of suicide in India: 2001-2013. *Soc Psychiatry Psychiatr Epidemiol* 2018;53(3):269-78. doi: 10.1007/s00127-017-1466-x [published Online First: 2017/12/07]
25. Bhola P, Manjula M, Rajappa V, et al. Predictors of non-suicidal and suicidal self-injurious behaviours, among adolescents and young adults in urban India. *Asian J Psychiatr* 2017;29:123-28. doi: 10.1016/j.ajp.2017.04.024 [published Online First: 2017/10/25]
26. Chanana K. Hinduism and Female Sexuality: Social Control and Education of Girls in India. *Sociological Bulletin* 2001;50(1):37-63.
27. Mullatti L. Families in India: Beliefs and Realities. *Journal of Comparative Family Studies* 1995;26:11-25.
28. Kposowa AJ. Marital status and suicide in the National Longitudinal Mortality Study. *J Epidemiol Community Health* 2000;54(4):254-61.
29. Latha KS, Bhat SM, D'Souza P. Suicide attempters in a general hospital unit in India: their socio-demographic and clinical profile--emphasis on cross-cultural aspects. *Acta Psychiatr Scand* 1996;94(1):26-30.
30. Srivastava MK, Sahoo RN, Ghotekar LH, et al. Risk factors associated with attempted suicide : a case control study. *Indian J Psychiatry* 2004;46(1):33-8.
31. Mary RA, Marslin G, Franklin G, et al. Test anxiety levels of board exam going students in Tamil Nadu, India. *Biomed Res Int* 2014;2014:578323. doi: 10.1155/2014/578323 [published Online First: 2014/08/22]
32. Kennedy J, King L. The political economy of farmers' suicides in India: indebted cash-crop farmers with marginal landholdings explain state-level variation in suicide rates. *Global Health* 2014;10:16. doi: 10.1186/1744-8603-10-16 [published Online First: 2014/03/29]
33. Munster D. Farmers' Suicides as Public Death: Politics, Agency and Statistics in a Suicide-Prone District (South India). *Modern Asian Studies* 2015;49(5):1580-605.
34. Spicer RS, Miller TR. Suicide acts in 8 states: incidence and case fatality rates by demographics and method. *Am J Public Health* 2000;90(12):1885-91. [published Online First: 2000/12/09]

- 1  
2  
3 35. Vijayakumar L, Jeyaseelan L, Kumar S, et al. A central storage facility to reduce  
4 pesticide suicides--a feasibility study from India. *BMC Public Health* 2013;13:850.  
5 doi: 10.1186/1471-2458-13-850 [published Online First: 2013/09/18]  
6  
7 36. Gunnell D, Ho D, Murray V. Medical management of deliberate drug overdose: a  
8 neglected area for suicide prevention? *Emerg Med J* 2004;21(1):35-8. [published  
9 Online First: 2004/01/22]  
10  
11 37. de Silva VA, Senanayake SM, Dias P, et al. From pesticides to medicinal drugs: time  
12 series analyses of methods of self-harm in Sri Lanka. *Bull World Health Organ*  
13 2012;90(1):40-6. doi: 10.2471/BLT.11.091785 [published Online First: 2012/01/25]  
14  
15 38. Till B, Wild TA, Arendt F, et al. Associations of Tabloid Newspaper Use With  
16 Endorsement of Suicide Myths, Suicide-Related Knowledge, and Stigmatizing  
17 Attitudes Toward Suicidal Individuals. *Crisis* 2018;39(6):428-37. doi: 10.1027/0227-  
18 5910/a000516 [published Online First: 2018/04/06]  
19  
20 39. Jamieson P, Jamieson K.H, Romer D. The Responsible Reporting of Suicide in Print  
21 Journalism. *AMERICAN BEHAVIORAL SCIENTIST* 2002;46(12):1643-60.  
22  
23  
24  
25  
26  
27  
28  
29  
30  
31  
32  
33  
34  
35  
36  
37  
38  
39  
40  
41  
42  
43  
44  
45  
46  
47  
48  
49  
50  
51  
52  
53  
54  
55  
56  
57  
58  
59  
60

1  
2  
3  
4  
5  
6  
7  
8  
9  
10  
11  
12  
13  
14  
15  
16  
17  
18  
19  
20  
21  
22  
23  
24  
25  
26  
27  
28  
29  
30  
31  
32  
33  
34  
35  
36  
37  
38  
39  
40  
41  
42  
43  
44  
45  
46

**Tables**

**Table 1: Binomial tests comparing the demographic characteristics of suicide decedents in newspaper reports vs. the population suicide statistics for Tamil Nadu**

| Characteristics                   | Male            |                  |                      | Female          |                  |                      | Total           |                  |                      |
|-----------------------------------|-----------------|------------------|----------------------|-----------------|------------------|----------------------|-----------------|------------------|----------------------|
|                                   | Newspaper % (n) | Population % (n) | p-value <sup>a</sup> | Newspaper % (n) | Population % (n) | p-value <sup>a</sup> | Newspaper % (n) | Population % (n) | p-value <sup>a</sup> |
| <b>Age</b>                        |                 |                  |                      |                 |                  |                      |                 |                  |                      |
| <18 years                         | 7.1% (54)       | 4.2% (446)       | <0.001               | 13.0% (85)      | 10.7% (537)      | 0.071                | 9.8% (139)      | 6.2% (983)       | <0.001               |
| 18-29 years                       | 31.5% (239)     | 24.7% (2656)     | <0.001               | 50.2% (328)     | 40.1% (2022)     | <0.001               | 40.1% (567)     | 29.7% (4678)     | <0.001               |
| 30-44 years                       | 26.2% (199)     | 34.9% (3749)     | <0.001               | 21.3% (139)     | 25.6% (1291)     | 0.016                | 23.9% (338)     | 31.9% (5040)     | <0.001               |
| 45-59 years                       | 23.4% (178)     | 25.5% (2742)     | 0.194                | 13.8% (90)      | 14.8% (746)      | 0.481                | 19.0% (268)     | 22.1% (3488)     | 0.006                |
| 60+ years                         | 11.8% (90)      | 10.6% (1141)     | 0.296                | 1.8% (12)       | 8.8% (445)       | <0.001               | 7.2% (102)      | 10.1% (1586)     | 0.001                |
| Total                             | 100.0% (760)    | 100.0% (10734)   |                      | 100.0% (654)    | 100.0% (5041)    |                      | 100.0% (1,414)  | 100.0% (15775)   |                      |
| <b>Marital status<sup>b</sup></b> |                 |                  |                      |                 |                  |                      |                 |                  |                      |
| Unmarried                         | 26.8% (125)     | 23.5% (2459)     | 0.096                | 34.5% (180)     | 22.3% (1100)     | <0.001               | 30.9% (305)     | 23.1% (3559)     | <0.001               |
| Married                           | 63.6% (297)     | 73.4% (7682)     | <0.001               | 60.8% (317)     | 72.1% (3556)     | <0.001               | 62.1% (614)     | 73.0% (11238)    | <0.001               |
| Separated                         | 4.1% (19)       | 1.2% (128)       | <0.001               | 3.1% (16)       | 3.1% (155)       | 1.000                | 3.5% (35)       | 1.8% (283)       | <0.001               |
| Divorced                          | 0.0% (0)        | 0.3% (21)        | 0.236                | 0.4% (2)        | 0.8% (38)        | 0.286                | 0.2% (2)        | 0.4% (69)        | 0.325                |
| Widowed                           | 5.6% (26)       | 1.6% (164)       | <0.001               | 1.2% (6)        | 1.6% (80)        | 0.484                | 3.2% (32)       | 1.6% (244)       | <0.001               |
| Total                             | 100.0% (467)    | 100.0% (10464)   |                      | 100.0% (521)    | 100.0% (4929)    |                      | 100.0% (988)    | 100.0% (15393)   |                      |
| <b>Suicide method</b>             |                 |                  |                      |                 |                  |                      |                 |                  |                      |
| Hanging                           | 52.7% (436)     | 42.5% (4555)     | <0.001               | 51.2% (349)     | 38.0% (1916)     | <0.001               | 52.1% (785)     | 41.0% (6471)     | <0.001               |
| Poisoning                         | 20.3% (168)     | 39.7% (4260)     | <0.001               | 19.8% (135)     | 35.2% (1775)     | <0.001               | 20.1% (303)     | 38.3% (6035)     | <0.001               |
| Fire/self-immolation              | 9.3% (77)       | 6.0% (643)       | 0.001                | 12.0% (82)      | 19.2% (967)      | <0.001               | 10.5% (159)     | 10.2% (1610)     | 0.659                |
| Under vehicle/train               | 4.5% (37)       | 2.9% (309)       | 0.007                | 3.8% (26)       | 0.9% (45)        | <0.001               | 4.2% (63)       | 2.2% (354)       | <0.001               |
| Drowning                          | 3.0% (25)       | 3.3% (357)       | 0.656                | 4.7% (32)       | 3.4% (171)       | 0.061                | 3.8% (57)       | 3.3% (528)       | 0.297                |
| Jumping (off structure)           | 2.5% (21)       | 0.6% (60)        | <0.001               | 4.1% (28)       | 0.1% (7)         | <0.001               | 3.2% (49)       | 0.4% (67)        | <0.001               |
| Self-inflicted injury             | 0.7% (6)        | 0.6% (68)        | 0.642                | 2.3% (16)       | 0.4% (18)        | <0.001               | 1.5% (22)       | 0.5% (86)        | <0.001               |
| Other                             | 6.9% (57)       | 4.5% (482)       | 0.001                | 1.9% (13)       | 2.8% (142)       | 0.159                | 4.6% (70)       | 4.0% (624)       | 0.203                |
| Total                             | 100.0% (827)    | 100.0% (10734)   |                      | 100.0% (681)    | 100.0% (5041)    |                      | 100.0% (1508)   | 100.0% (15775)   |                      |

<sup>a</sup> Two-tailed binomial test on difference between two proportions using the “prtesti” command in Stata

<sup>b</sup> Excludes those listed as ‘unknown’ and ‘other’ in the NCRB data

1  
2  
3  
4 **Figure 1: Comparing the proportion of female decedents in newspaper suicide reports**  
5 **vs. the population suicide statistics for Tamil Nadu**  
6  
7  
8  
9  
10  
11  
12  
13  
14  
15  
16  
17  
18  
19  
20  
21  
22  
23  
24  
25  
26  
27  
28  
29  
30  
31  
32  
33  
34  
35  
36  
37  
38  
39  
40  
41  
42  
43  
44  
45  
46  
47  
48  
49  
50  
51  
52  
53  
54  
55  
56  
57  
58  
59  
60

For peer review only



**Figure 2: Comparing the proportions of selected occupational groups of suicide decedents in newspaper reports vs. the population suicide statistics for Tamil Nadu**

For peer review only

1  
2  
3  
4  
5  
6  
7  
8  
9  
10  
11  
12  
13  
14  
15  
16  
17  
18  
19  
20  
21  
22  
23  
24  
25  
26  
27  
28  
29  
30  
31  
32  
33  
34  
35  
36  
37  
38  
39  
40  
41  
42  
43  
44  
45  
46  
47  
48  
49  
50  
51  
52  
53  
54  
55  
56  
57  
58  
59  
60

**Figure 1: Comparing the proportion of female decedents in newspaper suicide reports vs. the population suicide statistics for Tamil Nadu**

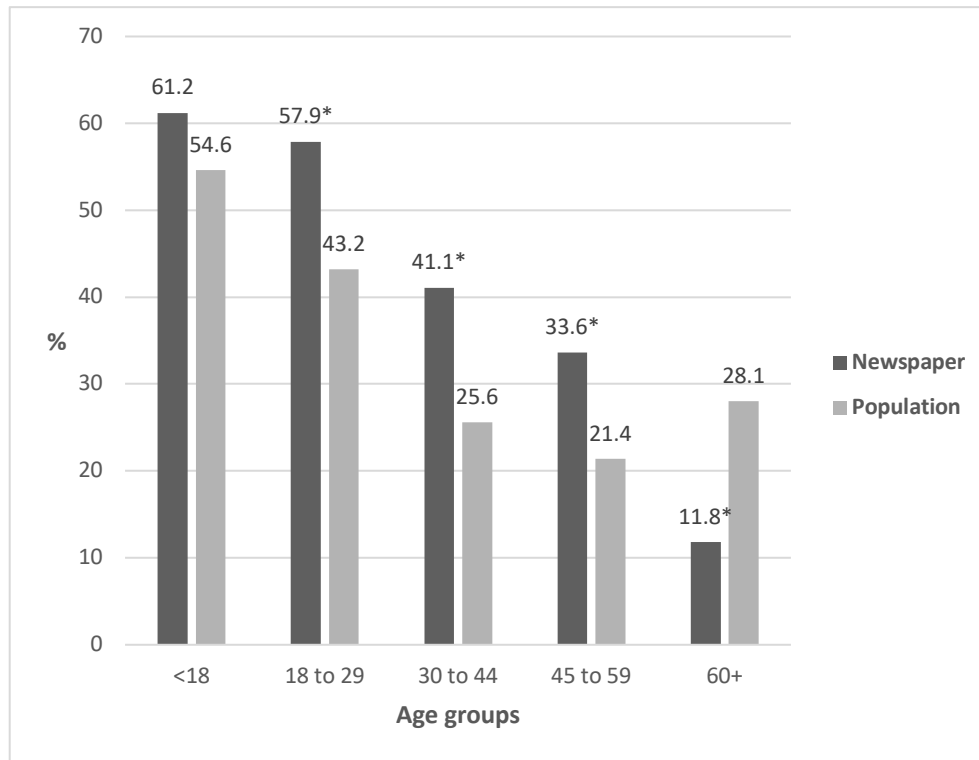

\* <math>p < 0.05</math>, based on two-sided binomial tests within each age group to calculate if the proportion of suicide deceased in the newspaper articles that were female was different to that in the official suicide statistics

View only

**Figure 2: Comparing the proportions of selected occupational groups of suicide decedents in newspaper reports vs. the population suicide statistics for Tamil Nadu**

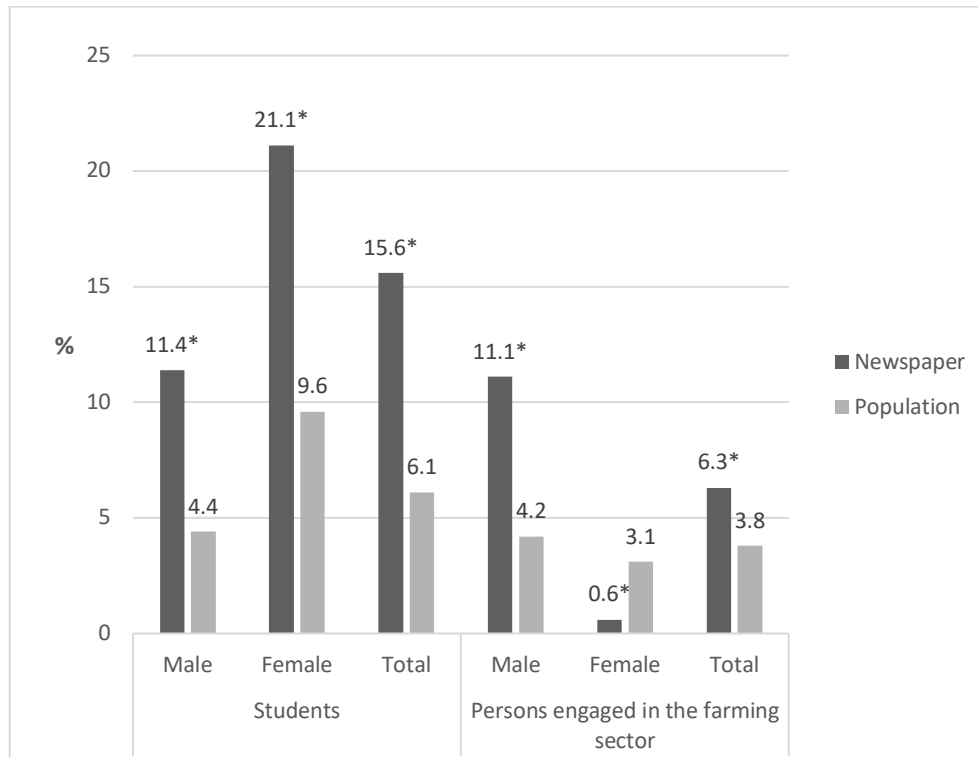

Note: The occupational categories of 'student' and 'persons engaged in the farming sector' were the only categories in the official statistics that were distinct enough to compare to the data we extracted from newspaper reports. Other occupational categories in the official suicide statistics (e.g. 'professionals/salaried persons') were too broad to be reproduced.

\*  $<0.05$ , based on two-sided binomial tests within each age group to calculate if the proportion of suicide deceased in the newspaper articles that were female was different to that in the official suicide statistics

Supplementary File 1: Secondary analyses only including media reports of suicides of people from Tamil Nadu

Figure 1: Comparing the proportion of female decedents in newspaper suicide reports vs. the population suicide statistics for Tamil Nadu

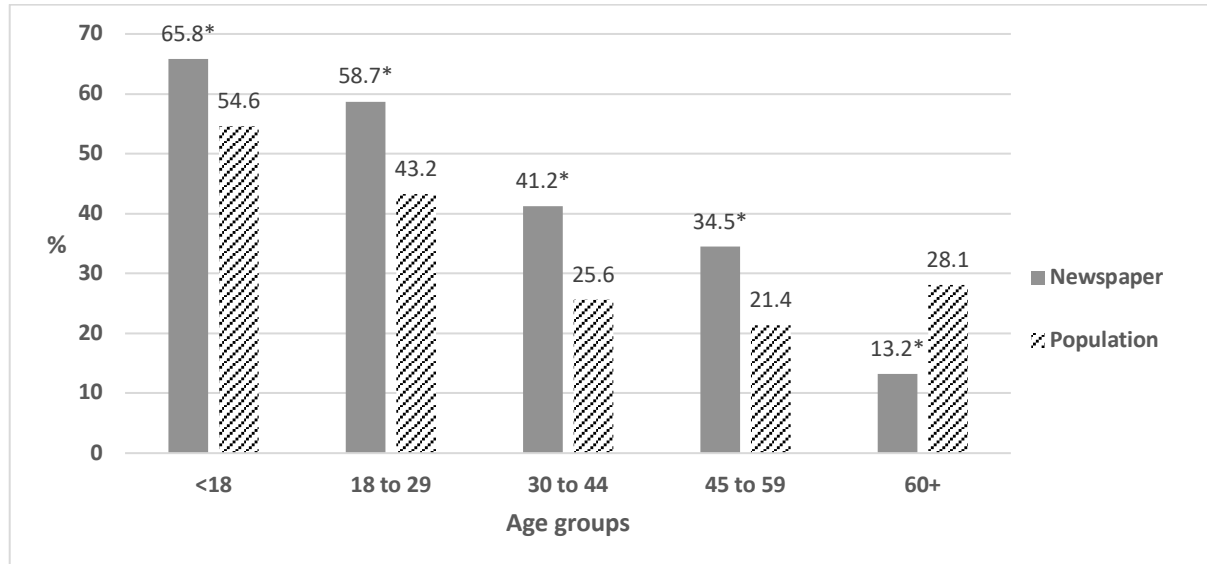

Note: Only includes newspaper reports of suicides of people residing in Tamil Nadu

\*  $<0.05$ , based on two-sided binomial tests within each age group to calculate if the proportion of suicide deceased in the newspaper articles that were female was different to that in the official suicide statistics

**Figure 2: Comparing the proportions of selected occupational groups of suicide decedents in newspaper reports vs. the population suicide statistics for Tamil Nadu**

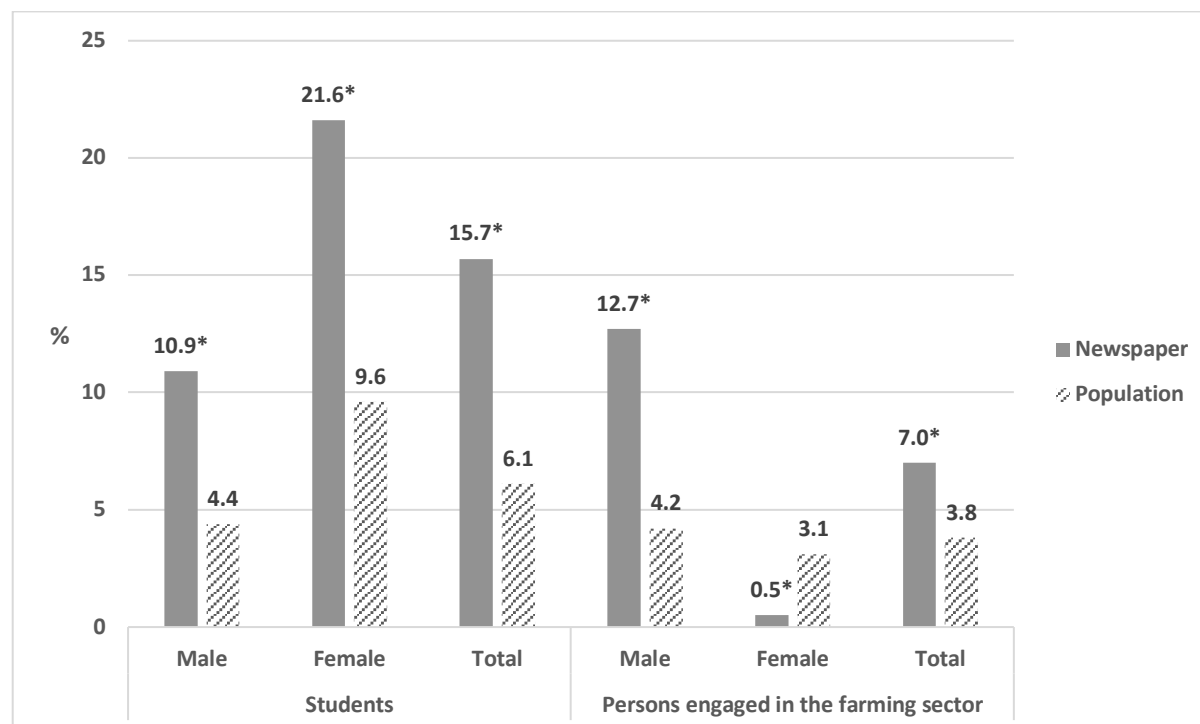

Note 1: Only includes newspaper reports of suicides of people residing in Tamil Nadu

Note 2: The occupational categories of 'student' and 'persons engaged in the farming sector' were the only categories in the official statistics that were distinct enough to compare to the data we extracted from newspaper reports. Other occupational categories in the official suicide statistics (e.g. 'professionals/salaried persons') were too broad to be reproduced.

\*  $<0.05$ , based on two-sided binomial tests within each age group to calculate if the proportion of suicide deceased in the newspaper articles that were female was different to that in the official suicide statistics

**Table 1: Binomial tests comparing the demographic characteristics of suicide decedents in newspaper reports vs. the population suicide statistics for Tamil Nadu**

| Characteristics                   | Male            |                  |                      | Female          |                  |                      | Total           |                  |                      |
|-----------------------------------|-----------------|------------------|----------------------|-----------------|------------------|----------------------|-----------------|------------------|----------------------|
|                                   | Newspaper % (n) | Population % (n) | p-value <sup>a</sup> | Newspaper % (n) | Population % (n) | p-value <sup>a</sup> | Newspaper % (n) | Population % (n) | p-value <sup>a</sup> |
| <b>Age</b>                        |                 |                  |                      |                 |                  |                      |                 |                  |                      |
| <18 years                         | 6.3% (41)       | 4.2% (446)       | 0.012                | 13.5% (79)      | 10.7% (537)      | 0.040                | 9.7% (120)      | 6.2% (983)       | <0.001               |
| 18-29 years                       | 32.2% (209)     | 24.7% (2656)     | <0.001               | 50.6% (297)     | 40.1% (2022)     | <0.001               | 40.9% (506)     | 29.7% (4678)     | <0.001               |
| 30-44 years                       | 26.6% (173)     | 34.9% (3749)     | <0.001               | 20.6% (121)     | 25.6% (1291)     | 0.008                | 23.8% (294)     | 31.9% (5040)     | <0.001               |
| 45-59 years                       | 22.8% (148)     | 25.5% (2742)     | 0.124                | 13.3% (78)      | 14.8% (746)      | 0.331                | 18.3% (226)     | 22.1% (3488)     | 0.002                |
| 60+ years                         | 12.2% (79)      | 10.6% (1141)     | 0.200                | 2.0% (12)       | 8.8% (445)       | <0.001               | 7.4% (91)       | 10.1% (1586)     | 0.002                |
| Total                             | 100.0% (650)    | 100.0% (10734)   |                      | 100.0% (587)    | 100.0% (5041)    |                      | 100.0% (1237)   | 100.0% (15775)   |                      |
| <b>Marital status<sup>b</sup></b> |                 |                  |                      |                 |                  |                      |                 |                  |                      |
| Unmarried                         | 26.3% (105)     | 23.5% (2459)     | 0.196                | 34.8% (162)     | 22.3% (1100)     | <0.001               | 30.9% (267)     | 23.1% (3559)     | <0.001               |
| Married                           | 64.3% (257)     | 73.4% (7682)     | <0.001               | 60.4% (281)     | 72.1% (3556)     | <0.001               | 62.2% (534)     | 73.0% (11238)    | <0.001               |
| Separated                         | 4.5% (18)       | 1.2% (128)       | <0.001               | 3.2% (15)       | 3.1% (155)       | 0.906                | 3.8% (33)       | 1.8% (283)       | <0.001               |
| Divorced                          | 0.0% (0)        | 0.3% (21)        | 0.273                | 0.2% (1)        | 0.8% (38)        | 0.151                | 0.1% (1)        | 0.4% (69)        | 0.167                |
| Widowed                           | 5.0% (20)       | 1.6% (164)       | <0.001               | 1.3% (6)        | 1.6% (80)        | 0.619                | 3.0% (26)       | 1.6% (244)       | <0.001               |
| Total                             | 100.0% (400)    | 100.0% (10464)   |                      | 100.0% (465)    | 100.0% (4929)    |                      | 100.0% (988)    | 100.0% (15393)   |                      |
| <b>Suicide method</b>             |                 |                  |                      |                 |                  |                      |                 |                  |                      |
| Hanging                           | 52.9% (358)     | 42.5% (4555)     | <0.001               | 52.4% (313)     | 38.0% (1916)     | <0.001               | 52.7% (671)     | 41.0% (6471)     | <0.001               |
| Poisoning                         | 21.4% (145)     | 39.7% (4260)     | <0.001               | 20.1% (120)     | 35.2% (1775)     | <0.001               | 20.8% (265)     | 38.3% (6035)     | <0.001               |
| Fire/self-immolation              | 11.2% (76)      | 6.0% (643)       | <0.001               | 12.1% (72)      | 19.2% (967)      | <0.001               | 11.6% (148)     | 10.2% (1610)     | 0.114                |
| Under vehicle/train               | 4.7% (32)       | 2.9% (309)       | 0.008                | 4.4% (26)       | 0.9% (45)        | <0.001               | 4.6% (58)       | 2.2% (354)       | <0.001               |
| Drowning                          | 3.3% (22)       | 3.3% (357)       | 1.000                | 4.0% (24)       | 3.4% (171)       | 0.448                | 3.6% (46)       | 3.3% (528)       | 0.566                |
| Jumping (off structure)           | 1.9% (13)       | 0.6% (60)        | <0.001               | 3.5% (21)       | 0.1% (7)         | <0.001               | 2.7% (34)       | 0.4% (67)        | <0.001               |
| Self-inflicted injury             | 0.9% (6)        | 0.6% (68)        | 0.334                | 2.2% (13)       | 0.4% (18)        | <0.001               | 1.5% (19)       | 0.5% (86)        | <0.001               |
| Other                             | 3.7% (25)       | 4.5% (482)       | 0.328                | 1.3% (8)        | 2.8% (142)       | 0.031                | 2.6% (33)       | 4.0% (624)       | 0.013                |
| Total                             | 100.0% (677)    | 100.0% (10734)   |                      | 100.0% (597)    | 100.0% (5041)    |                      | 100.0% (1274)   | 100.0% (15775)   |                      |

Note: Only includes newspaper reports of suicides of people residing in Tamil Nadu

<sup>a</sup> Two-tailed binomial test on difference between two proportions using the "prtesti" command in Stata

<sup>b</sup> Excludes those listed as 'unknown' and 'other' in the NCRB data

# BMJ Open

## Mass media representation of suicide in a high suicide state in India: an epidemiological comparison with suicide deaths in the population

|                                 |                                                                                                                                                                                                                                                                                                                                                                                                                                                                                                                                                                                                                                                                                                                                                                                                                           |
|---------------------------------|---------------------------------------------------------------------------------------------------------------------------------------------------------------------------------------------------------------------------------------------------------------------------------------------------------------------------------------------------------------------------------------------------------------------------------------------------------------------------------------------------------------------------------------------------------------------------------------------------------------------------------------------------------------------------------------------------------------------------------------------------------------------------------------------------------------------------|
| Journal:                        | <i>BMJ Open</i>                                                                                                                                                                                                                                                                                                                                                                                                                                                                                                                                                                                                                                                                                                                                                                                                           |
| Manuscript ID                   | bmjopen-2019-030836.R2                                                                                                                                                                                                                                                                                                                                                                                                                                                                                                                                                                                                                                                                                                                                                                                                    |
| Article Type:                   | Research                                                                                                                                                                                                                                                                                                                                                                                                                                                                                                                                                                                                                                                                                                                                                                                                                  |
| Date Submitted by the Author:   | 25-Jun-2019                                                                                                                                                                                                                                                                                                                                                                                                                                                                                                                                                                                                                                                                                                                                                                                                               |
| Complete List of Authors:       | Armstrong, Gregory; The University of Melbourne, Nossal Institute for Global Health, Melbourne School of Population and Global Health, Vijayakumar , Lakshmi ; Voluntary Health Services Hospital, Department of Psychiatry<br>Pirkis, Jane; University of Melbourne, Centre for Mental Health, Melbourne School of Population Health<br>Jayaseelan, Mala; Voluntary Health Services Hospital, Department of Psychiatry<br>Cherian, Anish; National Institute of Mental Health and Neuro Sciences, Department of Psychiatric Social Work<br>Soerensen, Jane; Kobenhavns Universitet, Department of Public Health<br>Arya, Vikas; Translational Health Research Institute (THRI)<br>Niederkrötenhaller, Thomas; Medical University of Vienna, Center for Public Health, Department of General Practice and Family Medicine |
| <b>Primary Subject Heading</b>: | Mental health                                                                                                                                                                                                                                                                                                                                                                                                                                                                                                                                                                                                                                                                                                                                                                                                             |
| Secondary Subject Heading:      | Global health, Epidemiology                                                                                                                                                                                                                                                                                                                                                                                                                                                                                                                                                                                                                                                                                                                                                                                               |
| Keywords:                       | Suicide & self-harm < PSYCHIATRY, MENTAL HEALTH, JOURNALISM (see Medical Journalism)                                                                                                                                                                                                                                                                                                                                                                                                                                                                                                                                                                                                                                                                                                                                      |
|                                 |                                                                                                                                                                                                                                                                                                                                                                                                                                                                                                                                                                                                                                                                                                                                                                                                                           |

SCHOLARONE™  
Manuscripts

# Mass media representation of suicide in a high suicide state in India: an epidemiological comparison with suicide deaths in the population

Gregory Armstrong<sup>1\*</sup>, Lakshmi Vijayakumar<sup>2,3</sup>, Jane Pirkis<sup>4</sup>, Mala Jayaseelan<sup>2</sup>, Anish Cherian<sup>5</sup>, Jane Brandt Sørensen<sup>6</sup>, Vikas Arya<sup>7</sup>, Thomas Niederkrotenthaler<sup>8</sup>

<sup>1</sup> Nossal Institute for Global Health, The University of Melbourne, Melbourne, Australia

<sup>2</sup> Department of Psychiatry, Voluntary Health Services, Chennai, India

<sup>3</sup> SNEHA Suicide Prevention Centre, Chennai, India

<sup>4</sup> Centre for Mental Health, The University of Melbourne, Melbourne, Australia

<sup>5</sup> Department of Psychiatric Social Work, National Institute of Mental Health and Neurosciences, Bengaluru, India.

<sup>6</sup> Department of Public Health, University of Copenhagen, Denmark

<sup>7</sup> Translational Health Research Institute, The University of Western Sydney, Sydney, Australia

<sup>8</sup> Centre for Public Health, Medical University of Vienna, Vienna, Austria

Corresponding author:

Gregory Armstrong, Nossal Institute for Global Health, Melbourne School of Population and Global Health, University of Melbourne, 333 Exhibition St, Melbourne, Victoria 3010, Australia. Email: [g.armstrong@unimelb.edu.au](mailto:g.armstrong@unimelb.edu.au)

## Abstract

### Objectives:

Suicide rates in India are among the highest in the world, equating to over 200,000 suicides annually. Reports of suicides are a routine feature in major newspapers in India, and reporters may selectively present “newsworthy” suicide stories. The aim of this paper was to systematically investigate whether mass media reports of suicides reflect the epidemiological data on suicide in a high suicide state in India.

### Design:

We undertook a content analysis study to extract socio-demographic data on suicides reported among nine of the most highly read daily newspapers in the high suicide southern state of Tamil Nadu between June–December 2016. A total of 1,258 newspaper articles were retrieved containing reports on 1,631 suicides. Two-tailed binomial tests on aggregate frequencies assessed whether the socio-demographic characteristics of suicides in the newspaper articles were different to the population suicide statistics for Tamil Nadu.

### Results:

We identified some statistically significant discrepancies between suicide characteristics in the population and the media. Suicides involving females ( $p < 0.001$ ), those aged under 30 years ( $p < 0.001$ ), separated or widowed males ( $p < 0.001$ ), unmarried females ( $p < 0.001$ ), those using methods with a higher case-fatality rate (i.e. hanging ( $p < 0.001$ ), jumping off high



1  
2  
3 structures ( $p<0.001$ ) and coming under vehicles ( $p<0.001$ ), and those who were students  
4 ( $p<0.001$ ) or working in the agricultural sector ( $p<0.001$ ) were significantly over-reported  
5 relative to their occurrence in the broader population. Suicides involving males ( $p<0.001$ ),  
6 those aged over 30 years and above ( $p<0.001$ ), those who were married, and suicides by  
7 poisoning ( $p<0.001$ ) were significantly under-reported relative to their occurrence in the  
8 broader population.  
9

### 10 11 **Conclusions:**

12 The suicide characteristics in the print media were not entirely representative of suicides in  
13 the broader Tamil Nadu population, which may lead the general public to develop  
14 misunderstandings about suicide in their state. The discrepancies we identified will inform  
15 tailored suicide prevention education for media professionals.  
16  
17  
18  
19

### 20 21 **Strengths and limitations of this study**

- 22 • Suicides are a routine feature in major newspapers in India, and this is the first study  
23 to examine whether these media reports of suicides reflect the epidemiological data  
24 on suicide in India.
- 25 • We followed nine major newspapers over seven months and collected a large sample  
26 of 1,631 media reports of suicides.
- 27 • We only looked at printed newspapers in one state with a high suicide rate; with  
28 further funding it would be desirable to examine media reports by other forms of mass  
29 and social media across a broader range of states.
- 30 • A large proportion of suicides are not captured in the official suicide statistics in  
31 India, due to a sole reliance on police data and the lack of a comprehensive and  
32 reliable vital registration system. Given both the official statistics and the media  
33 reports used in this study are based on police reports of suicide, we expect that this  
34 will have a negligible effect on the comparisons made in our study.
- 35 • While our findings provide some epidemiological clues as to the decisions made by  
36 media professionals in choosing whether to report on a suicide, further qualitative  
37 research with media professionals is required to better understand the decision-  
38 making process and any biases that may be involved.  
39  
40  
41  
42  
43  
44  
45  
46  
47  
48  
49  
50  
51  
52  
53  
54  
55  
56  
57  
58  
59  
60

## Background

Southeast Asia accounts for roughly 40% of the estimated 800,000 suicides that occur each year globally<sup>1</sup>. Suicide rates in India are among the highest in the world with the most recent suicide death rate estimates ranging between 18-21 deaths per 100,000 population (*c.f.* the global average of 11/100,000). This equates to an estimated 230,000-250,000 suicide deaths annually with far-reaching social, emotional and economic consequences<sup>1,2</sup>. A public health approach to suicide is gaining momentum in India with calls for the development of national and state-level suicide prevention strategies, including the development of media guidelines to improve mass and social media coverage of suicides<sup>3</sup>.

One of the few recommended suicide prevention strategies at the population level is responsible media reporting of suicides<sup>4-6</sup>, based on evidence around copycat suicides, dissemination of suicide methods and behaviours, and the imperative to deliver tailored suicide prevention messaging in media content<sup>7-12</sup>. Consequently, the World Health Organization (WHO) recommends that public health specialists should engage with media professionals to limit irresponsible media coverage (for example, reports that sensationalise suicide) and to promote coverage that educates the public about suicide<sup>13</sup>.

The manner by which the mass media communicates with the Indian public on the topic of suicide in India has thus far gone without sufficient inquiry<sup>14</sup>. Our own recent research into print media portrayals of suicide in India observed that explicit suicide reports are a routine feature, and that potentially harmful reporting practices are common<sup>15</sup>. For example, a detailed suicide method was reported in 43.3% of articles. Given that there are few alternative sources of publicly-disseminated information on suicide in India, as the suicide prevention sector is relatively under-resourced, these mass media portrayals of suicide are quite possibly playing a critical role in shaping and reflecting public attitudes and behaviours in relation to suicide.

Researchers have long recognised the disparity between the epidemiological data on suicide in the population and the stories selectively presented for mass media reports<sup>16</sup>. In suicide prevention, there is a major focus on disseminating knowledge on the risk factors and the complex multilayered context for suicide<sup>6</sup>. This can be at odds with media preferences for newsworthy stories that are atypical or that play to broader social narratives of interest to readers. Hence, one important area of enquiry for suicide prevention is to better understand what kinds of suicides media broadcast to the public, to shed light on possible misunderstandings of the epidemiological realities that can inform media training and engagement strategies. Very few studies have examined which suicides tend to feature in the media. Those that have, found that the mass media selectively present newsworthy suicide stories that do not reflect the broader array of suicides in the population<sup>17-20</sup>, which can carry profound implications for the social and political responses to suicide.

This phenomenon is yet to be studied in India. This paper seeks to address this gap in the literature by comparing the characteristics of suicides in print media reports in India against the characteristics of suicides in the population. Due to the large number of languages across India and the prohibitive level of resources required to fund a study with a broad national spread of newspapers published in a range of languages, we elected to undertake a comprehensive study of newspaper reporting in one state. We chose the southern state of Tamil Nadu (population = 72 million), which consistently has one of the highest suicide rates

1  
2  
3 in India (22.8/100,000) equating to 15,777 recorded suicides in 2015, over 40 suicides per  
4 day<sup>21</sup>. The approach of focusing on one state allows us to comprehensively track changes in  
5 media reporting in this state following upcoming efforts to engage with the media on this  
6 topic.  
7

## 8 **Methods**

9  
10 As part of the Suicide in the Indian Media (SIM) project <sup>15</sup>, we undertook a content analysis  
11 study of articles reporting suicide-related news in nine of the ten most highly read vernacular  
12 and English-language daily newspapers in Tamil Nadu over the 7-month period between 1<sup>st</sup>  
13 June and 31<sup>st</sup> December 2016. The nine newspapers collectively have an estimated average  
14 daily readership of over 16,000,000 people in Tamil Nadu alone <sup>22</sup>. Five of the nine  
15 newspapers under review are in the top 20 most circulated daily newspapers in the country <sup>23</sup>,  
16 giving the findings relevance beyond Tamil Nadu. We previously published research from  
17 this content analysis study where we assessed the quality of newspaper reporting of suicide-  
18 related news against World Health Organization suicide reporting guidelines <sup>13 15</sup>.  
19

20  
21 To source the articles, the hardcopies of all 1,926 (9 newspapers x 214 days) editions of the  
22 nine newspapers during the study period were hand searched by three trained research  
23 assistants (psychologists), allowing us to include several newspapers that did not have a  
24 strong online presence. Our search yielded 1,258 articles containing reports on 1,631  
25 suicides; the vast majority of these suicides were of people from Tamil Nadu (84.0%,  
26 n=1371), while the remainder were largely of people from elsewhere in India (14.5%, n=236)  
27 or from other countries (1.1%, n=18), with location unable to be determined in 0.4% (n=6) of  
28 the media reports. We elected to retain all suicides in our primary analyses, regardless of the  
29 location of the deceased, as these reports will still influence the public's impressions of who  
30 is affected by suicide; secondary analyses will exclusively examine suicides of people from  
31 Tamil Nadu. We excluded articles where suicide was only mentioned briefly (i.e. <50% of the  
32 article) and articles with a focus on terrorist-related suicide bombings or euthanasia.  
33  
34

35  
36 A bi-lingual psychologist and researcher (MPsych, MPhil) extracted data on gender, age,  
37 marital status, suicide method and occupational status for each suicide. We compared the data  
38 extracted from the newspaper articles with the characteristics of suicides in the Tamil Nadu  
39 population suicide statistics found in the Accidental Death & Suicides in India report for  
40 2015 published by the National Crime Records Bureau (NCRB) <sup>21</sup>.  
41  
42

43  
44 Comparing occupational status between the two data sets was complicated by the use of  
45 broad category descriptors in the NCRB data (for example, 'professionals/salaried persons')  
46 that were not possible to reproduce. However, there were two occupational categories that  
47 were distinct enough to legitimately reproduce and examine; 'students' and 'persons engaged  
48 in the farming sector'. Both are occupational groups that have been of significant interest to  
49 suicide prevention in India and would resonate strongly with the public when discussing the  
50 topic of suicide <sup>24 25</sup>.  
51

52  
53 We disaggregated the data by gender, and in doing so we excluded suicides of *Hijra* and  
54 transgender people due to the very small numbers of such cases; there were 13 reports of  
55 suicide deceased who were Hijra/transgender in the newspaper articles and 2 such suicide  
56 deceased in the official suicide records for Tamil Nadu.  
57

58  
59 Two-tailed binomial tests on aggregate frequencies were used in Stata (command "prtesti") to  
60 assess whether the distribution of the characteristics of suicides in the newspaper articles was

1  
2  
3 different to their distribution in the population suicide statistics for Tamil Nadu. This analysis  
4 approach has been used previously by a similar media study in Austria<sup>17</sup>. Not all media  
5 reports contained data on all the variables we analysed, so percentages were calculated based  
6 on data for those individuals for whom these characteristics were reported in the article.  
7

## 8 **Patient and public involvement**

9 Patients and the public were not involved in the design or planning of this study.  
10  
11

## 12 **Results**

13 Binomial tests showed that female suicides were over-reported relative to their occurrence in  
14 the broader population of suicides, comprising 45.3% (729/1610) of suicides in newspaper  
15 reports compared to 32.0% (n=5041/15775) of suicides in the official suicide statistics  
16 (p<0.001) (see Figure 1). While newspapers covered a significantly higher percentage of  
17 female suicides, this was not the case across all age groups. There was no statistically  
18 significant difference in the <18 years age group, and we observed the reverse pattern in the  
19 60+ years age group, such that female suicides were significantly under-reported.  
20  
21

22 Binomial tests showed that the suicides of those aged less than 30 years were over-reported  
23 relative to their occurrence in the broader population (see Table 1). Conversely, the suicides  
24 of those aged 30 years or older were under-reported. The suicides of those who were  
25 unmarried, separated and widowed were over-reported, while the suicides of those who were  
26 married were under-reported. The gender stratification of these marital status results  
27 highlighted a gender-based difference. Suicides among separated and widowed males were  
28 over-reported while it was the suicides of unmarried females that were over-reported; the  
29 suicides of those who were married were under-reported in both males and females.  
30  
31

32 The suicides of students and those engaged in the farming sector were over-reported relative  
33 to their occurrence in the broader population (see Figure 2). Students comprised 15.6%  
34 (255/1631) of all suicides in newspaper reports compared to 6.1% (955/15775) of suicides in  
35 the official suicide statistics (p<0.001). People engaged in the farming sector comprised 6.3%  
36 (102/1631) of all suicides in newspaper reports compared to 3.8% (606/15775) of suicides in  
37 the official suicide statistics (p<0.001). Conversely, the suicides of females in the agricultural  
38 sector were under-represented in media reports.  
39  
40

41 Deaths involving hanging, coming under vehicle/train, jumping off building/structure and  
42 self-inflicted injury such as a knife wound were over-reported, while suicides by poisoning  
43 were under-reported (see Table 1).  
44  
45

46 Secondary analyses were undertaken, only including media reports of suicides of people from  
47 Tamil Nadu, to examine if our findings were confounded by media reports of suicides of  
48 people from outside Tamil Nadu. The results are consistent with the primary analyses (See  
49 Supplementary File 1).  
50  
51

## 52 **Discussion**

53 The present study identified substantial disparities between suicide characteristics in the  
54 population and the media. Suicides involving females, those aged under 30 years, separated  
55 or widowed males, unmarried females, and those using lethal methods (other than pesticides)  
56 were significantly over-reported relative to their occurrence in the broader population. The  
57 suicides of people from the occupational groups of students or persons engaged in the  
58 agricultural sector were also over-reported.  
59  
60

1  
2  
3  
4 An important finding was that female suicides were significantly over-represented, relative to  
5 their occurrence in the population. This finding appears to be unique to India and is in stark  
6 contrast to what has been observed elsewhere. No under or over-reporting was observed in  
7 Australia<sup>19</sup> or Austria<sup>17</sup> based on gender. However, in the Chinese settings of Guangzhou  
8 and Taiwan, female suicides have been observed to be under-reported<sup>20</sup>, the opposite pattern  
9 to our findings. The authors posited that, in traditional Chinese societies, women can be  
10 stereotyped as being more emotional or hysterical, and more prone to suicide. Such that, they  
11 felt media professionals may perceive the suicide deaths of men to be more unusual and thus  
12 newsworthy.  
13  
14

15  
16 In India, the female suicide rate is among the highest in the world, and is nearly three times  
17 higher than the rate expected globally for countries at similar levels of Socio-Demographic  
18 Index<sup>2</sup>. This well-documented fact about suicide in India could possibly permeate the minds  
19 of media professionals, who may then give greater emphasis to the plight of females who  
20 take their lives. Notwithstanding this, it is also likely that there are some other reasons media  
21 professionals decide that the suicides of females are more newsworthy. Based on our  
22 anecdotal conversations with media professionals, we speculate that female suicides may also  
23 be perceived by media professionals to generate a greater empathic response among readers  
24 of newspapers in India. Stories of the suicides of females may align with paternalistic  
25 narratives about the risks to women in Indian society and the family and collective  
26 responsibility to protect them<sup>26</sup>.  
27  
28

29  
30 We also observed an under-reporting of suicides of married males and females. Moreover, we  
31 observed that, among female suicides, there was an over-reporting of suicides among those  
32 who were unmarried. This was quite distinct from what was observed among male suicides,  
33 where suicides by separated or widowed males were over-reported in the newspapers. It is  
34 unclear why there is an apparent media preference for stories of unmarried females and  
35 separated or widowed males, nor what cultural scripts or narratives this may align with.  
36 Marriage and family are at the core of the social fabric in India<sup>27</sup>, and family is the main  
37 source of welfare protections. We speculate that risks associated with being outside of the  
38 institution of marriage may be being emphasised by media professionals through their  
39 selection of suicide stories pertaining to people whose marriage has been lost or who are yet  
40 to enter marriage. Through this under-reporting of suicides of married people, these media  
41 reports may actually be giving an incorrect signal to the population with regard to any suicide  
42 prevention protections that may be assumed to be gained from being married. It is important  
43 to note that while marriage is typically understood to protect against suicide, particularly for  
44 men, based on findings from studies in Western settings<sup>28</sup>, this is not the case in India.  
45 Research undertaken in India yields mixed findings regarding the relationship between  
46 marital status and suicide for both men and women, suggesting that either marriage is not a  
47 protective factor for suicide, or indeed that the risk of suicide is higher among those who are  
48 married<sup>29 30</sup>. This epidemiological reality regarding marriage and suicide may conflict with  
49 narratives in India that locate 'the family' as the main source of social protections. Clearly  
50 this is speculation, and so qualitative research with media professionals is required to better  
51 understand the phenomenon of the influential role of gender and marital status in the  
52 perceived newsworthiness of suicide deaths. We note though, that even such qualitative  
53 interviews may find it hard to unravel what may be unconscious and deeply culturally  
54 embedded biases among media professionals.  
55  
56  
57  
58  
59  
60

1  
2  
3 Our findings suggest that the suicides of younger persons aged <30 years were considered to  
4 be more newsworthy than the suicide deaths of persons aged 30 years and older. This finding  
5 is largely consistent with research from Australia<sup>19</sup>, Austria<sup>17</sup> and China<sup>20</sup>. It has been  
6 posited that youth suicides may be considered more newsworthy; that is, the death of a youth  
7 with their life ahead of them carries a sensational undertone that may grab the reader's  
8 attention<sup>20</sup>. Suicide is also the leading cause of death among youth in India aged 15-29 years,  
9 and greater than 70% of female suicide deaths and 50% of male suicide deaths are in this age  
10 group<sup>2</sup>. Thus, it is possible that media professionals may be attempting to give such suicide  
11 deaths greater emphasis without being aware that they may in turn be overlooking the issue  
12 of suicide among older aged people, also a high-risk period for both males and females in  
13 India<sup>2</sup>.  
14  
15  
16

17 Our findings also revealed that the suicides of students and people engaged in the agricultural  
18 sector were significantly over-represented, relative to their occurrence in the population. This  
19 finding was not surprising, given that both occupational groups are of significant interest to  
20 the public discourse and narratives around suicide in India<sup>24 25</sup>. Media houses would be  
21 aware that reports on such deaths would resonate strongly with readers. Student suicides are a  
22 major and topical policy issue in India, frequently located within discussions around the  
23 fierce competition for student places and an accompanying intensity of exam pressure<sup>31</sup>.  
24 Reporting on this issue will likely be of great interest to parents, who may carry a level of  
25 fear around this happening to their own children. Farmer suicides are highly politicised in  
26 India, and have been the subject of numerous government commissions and policy dialogues.  
27 This has largely been with a focus on issues around the high levels of indebtedness among  
28 farmers, a decline in secure institutional credit, water scarcity, trade liberalisation, and a  
29 considerable vulnerability to "crop failure"<sup>32</sup>. Farmer suicide deaths have been described as  
30 "public deaths", due to the perception that they receive sensational coverage by the mass  
31 media<sup>33</sup>.  
32  
33  
34  
35

36 Finally, suicides by particular methods also appeared to attract more media attention. Deaths  
37 involving hanging, jumping, and coming under vehicle/train were over-represented in media  
38 reports, while suicides by poisoning were under-represented. One interpretation of this  
39 finding is that media may be attracted to reporting on suicides using methods with a higher  
40 degree of lethality, given that these have been observed to have a high case fatality rate<sup>34</sup>.  
41 Deaths involving self-inflicted injuries (e.g. knife wound) were also over-reported, even  
42 though this method does not have a high case fatality rate, indicating that newspaper reporters  
43 may also have an interest in particular suicide methods where it is easy for them to construct  
44 a graphic visual that may attract the attention of the reader. The under-reporting of poisoning  
45 suicide deaths is also an interesting finding. While the ingestion of medical drugs typically  
46 has a low case fatality rate<sup>34</sup>, the ingestion of pesticides, a common suicide method in India  
47 and elsewhere in South Asia<sup>35</sup>, has a high case fatality rate and is a major contributor to high  
48 suicide rates in this region<sup>36 37</sup>.  
49  
50  
51

52 These findings have important implications for suicide prevention. While the mass media are  
53 a powerful resource for educating the public about suicide, the general public may develop  
54 misunderstandings about suicide that are caused by media misrepresentations. For example,  
55 Till et al observed that the consumption of tabloid newspapers in Austria for daily  
56 information appeared to be an independent factor in the endorsement of misconceptions and  
57 myths about suicide<sup>38</sup>. While we didn't assess the articles for suicide myths, we did observe  
58 substantial disparities between suicide characteristics in the population and the media. Strong  
59 biases towards reporting particular types of suicide deaths may result in social and political  
60

1  
2  
3 responses to suicide that are not based on the epidemiological data. For instance, if media  
4 reports are overly biased towards the coverage of female suicides, youth suicides, suicides  
5 among particular occupational groups, or particularly graphic or more lethal suicide methods,  
6 this may inadvertently affect suicide prevention funding allocations, public perceptions about  
7 who is most at risk of suicide and the method they may use, among other possible  
8 consequences.  
9

10  
11 The study has several limitations that are worth noting. Firstly, we compared data from media  
12 reports collected in 2016 against the official suicide statistics for 2015. While these are two  
13 different time periods, it is the most recently available suicide statistics for India and we  
14 expect a high degree of stability between the 2015 and 2016 data. We compared the official  
15 suicide statistics for 2015 against that for 2014 and 2013 and we observed a high degree of  
16 stability in the data; for example, the suicide rate for Tamil Nadu was 22.8 in 2015 and 23.4  
17 in 2014, and 29.7% and 30.7% of suicide deaths were people aged 18-29 in 2015 and 2013  
18 respectively. Secondly, there is a high level of under-reporting of suicide in India. Given both  
19 the official statistics and the media reports are based on police reports of suicide, we expect  
20 that this will have a negligible effect on the comparisons made in our study. Thirdly, while  
21 our findings provide some clues as to the decisions made by media professionals in choosing  
22 whether to report on a suicide, we cannot speak definitively about the decision-making  
23 process and any biases that may be involved. We are currently undertaking qualitative  
24 research with media professionals to better understand this phenomenon<sup>39</sup>. Fourthly, we  
25 were only able to examine the over or under-representation of two occupational categories  
26 that we could meaningfully reproduce. There are several additional occupational categories  
27 that would have been interesting to examine; for example, “housewives” comprised 53% of  
28 female suicide deaths in the 2015 official suicide statistics, yet this occupational information  
29 or the specific term was rarely communicated in media reports. Finally, we only examined  
30 newspaper reports in one southern state of India where the suicide rate is substantially higher  
31 than the national average. It is possible that our findings do not reflect newspaper coverage of  
32 suicide in other states of India, particularly those with a lower suicide rate where mass media  
33 reports of suicides may be less common. Future research should examine reports in other  
34 states as well as reports in other forms of mass and social media.  
35  
36  
37  
38  
39

## 40 **Conclusion**

41 The suicide characteristics in the print media in Tamil Nadu were not entirely representative  
42 of suicides in the broader population. A moderately skewed picture of reality is being  
43 presented to the community, which may lead the general public to develop misunderstandings  
44 about suicide in their state. In particular, suicides involving females, those aged under 29  
45 years, separated or widowed males, unmarried females, those using methods with a higher  
46 case-fatality rate, and those who were students or working in the agricultural sector were  
47 significantly over-reported relative to their occurrence in the broader population. Conversely,  
48 suicides involving males, those aged over 30 years and above, those who were married, and  
49 suicides by poisoning were significantly under-reported relative to their occurrence in the  
50 broader population. The discrepancies we identified will inform tailored suicide prevention  
51 education for media professionals.  
52  
53  
54

## 55 **Contributors**

56 GA designed the study, supervised the data collection, and led the data analyses and drafting  
57 of the manuscript. LV and TN supported the design of the study. MJ implemented data  
58 collection. LV, JP, MJ, AC, JBS, VA and TN all contributed to the data analysis plan,  
59 interpretation of the results and the development of the final manuscript.  
60

## Acknowledgements

We thank Ms Asha Ramia Veeraraghavachary, Mrs Thangaraj Fathima Roseline and Ms Nivetha Vincent from Voluntary Health Services in Chennai for their thorough work in hand searching the nine newspapers for the relevant articles for this study.

## Competing interests

None declared.

## Ethics approval

The data used in this study are from publicly available documents. Nonetheless, we obtained ethics approvals from the Human Ethics Advisory Group at The University of Melbourne in Australia (ID: 1646245.1).

## Funding

The lead author is funded by an Early Career Fellowship from the National Health and Medical Research Council in Australia (GNT1138096). This study was funded by Early Career Researcher Awards from The Society for Mental Health Research and The University of Melbourne.

## Data sharing

The data used in this study are publicly available media reports and publicly available official reports on suicides in India. Anyone interested in accessing our database on media reports of suicides may contact the corresponding author.



## References

1. World Health Organization. Preventing suicide: A global imperative. Geneva: World Health Organization 2014.
2. India State-Level Disease Burden Initiative Suicide Collaborators. Gender differentials and state variations in suicide deaths in India: the Global Burden of Disease Study 1990-2016. *Lancet Public Health* 2018;3(10):e478-e89. doi: 10.1016/S2468-2667(18)30138-5 [published Online First: 2018/09/17]
3. Armstrong G, Vijayakumar L. Suicide in India: a complex public health tragedy in need of a plan. *Lancet Public Health* 2018 doi: 10.1016/S2468-2667(18)30142-7 [published Online First: 2018/09/17]
4. Zalsman G, Hawton K, Wasserman D, et al. Suicide prevention strategies revisited: 10-year systematic review. *Lancet Psychiatry* 2016;3(7):646-59. doi: 10.1016/S2215-0366(16)30030-X
5. Turecki G, Brent DA. Suicide and suicidal behaviour. *Lancet* 2016;387(10024):1227-39. doi: 10.1016/S0140-6736(15)00234-2
6. O'Connor R, Pirkis J. The International Handbook of Suicide Prevention. Second Edition ed. United Kingdom: Wile-Blackwell 2016.
7. Niederkrotenthaler T, Voracek M, Herberth A, et al. Role of media reports in completed and prevented suicide: Werther v. Papageno effects. *British Journal of Psychiatry* 2010;197(3):234-43. doi: 10.1192/bjp.bp.109.074633
8. Cheng Q, Chen F, Yip PS. Media effects on suicide methods: A case study on Hong Kong 1998-2005. *PLoS One* 2017;12(4):e0175580. doi: 10.1371/journal.pone.0175580
9. King KE, Schlichthorst M, Spittal MJ, et al. Can a documentary increase help-seeking intentions in men? A randomised controlled trial. *J Epidemiol Community Health* 2018;72(1):92-98. doi: 10.1136/jech-2017-209502 [published Online First: 2017/11/05]
10. Niederkrotenthaler T, Fu KW, Yip PS, et al. Changes in suicide rates following media reports on celebrity suicide: a meta-analysis. *Journal of Epidemiology and Community Health* 2012;66(11):1037-42. doi: 10.1136/jech-2011-200707
11. Chen YY, Chen F, Yip PS. The impact of media reporting of suicide on actual suicides in Taiwan, 2002-05. *J Epidemiol Community Health* 2011;65(10):934-40. doi: 10.1136/jech.2010.117903 [published Online First: 2010/12/08]
12. Kunrath S, Baumert J, Ladwig KH. Increasing railway suicide acts after media coverage of a fatal railway accident? An ecological study of 747 suicidal acts. *J Epidemiol Community Health* 2011;65(9):825-8. doi: 10.1136/jech.2009.098293 [published Online First: 2010/10/22]
13. World Health Organization, International Association for Suicide Prevention. Preventing suicide: a resource for media professionals, update 2017. Geneva: World Health Organization, 2017.
14. Ponnudurai R. Suicide in India - changing trends and challenges ahead. *Indian Journal of Psychiatry* 2015;57(4):348-54. doi: 10.4103/0019-5545.171835
15. Armstrong G, Vijayakumar L, Niederkrotenthaler T, et al. Assessing the quality of media reporting of suicide news in India against World Health Organization guidelines: A content analysis study of nine major newspapers in Tamil Nadu. *Aust N Z J Psychiatry* 2018;52(9):856-63. doi: 10.1177/0004867418772343 [published Online First: 2018/05/05]

16. Shoemaker P, Cohen A. News around the world : content, practitioners, and the public. New York: Routledge 2006.
17. Niederkrotenthaler T, Till B, Herberth A, et al. The gap between suicide characteristics in the print media and in the population. *Eur J Public Health* 2009;19(4):361-4. doi: 10.1093/eurpub/ckp034
18. Chen YY, Yip PS, Tsai CW, et al. Media representation of gender patterns of suicide in Taiwan. *Crisis* 2012;33(3):144-50. doi: 10.1027/0227-5910/a000118
19. Machlin A, Pirkis J, Spittal MJ. Which suicides are reported in the media - and what makes them "newsworthy"? *Crisis* 2013;34(5):305-13. doi: 10.1027/0227-5910/a000177
20. Fu KW, Chan YY, Yip PS. Newspaper reporting of suicides in Hong Kong, Taiwan and Guangzhou: compliance with WHO media guidelines and epidemiological comparisons. *Journal of Epidemiology and Community Health* 2011;65(10):928-33. doi: 10.1136/jech.2009.105650
21. National Crime Records Bureau. Accidental Deaths & Suicides in India: 2015. New Delhi, India: Ministry of Home Affairs, Government of India 2015.
22. Media Research Users Council. Indian Readership Survey 2014. Mumbai, India: Media Research Users Council 2017.
23. Audit Bureau of Circulations. Details of most circulated publications for the audit period January - June 2014. Mumbai, India: Audit Bureau of Circulations 2015.
24. Arya V, Page A, River J, et al. Trends and socio-economic determinants of suicide in India: 2001-2013. *Soc Psychiatry Psychiatr Epidemiol* 2018;53(3):269-78. doi: 10.1007/s00127-017-1466-x [published Online First: 2017/12/07]
25. Bhola P, Manjula M, Rajappa V, et al. Predictors of non-suicidal and suicidal self-injurious behaviours, among adolescents and young adults in urban India. *Asian J Psychiatr* 2017;29:123-28. doi: 10.1016/j.ajp.2017.04.024 [published Online First: 2017/10/25]
26. Chanana K. Hinduism and Female Sexuality: Social Control and Education of Girls in India. *Sociological Bulletin* 2001;50(1):37-63.
27. Mullatti L. Families in India: Beliefs and Realities. *Journal of Comparative Family Studies* 1995;26:11-25.
28. Kposowa AJ. Marital status and suicide in the National Longitudinal Mortality Study. *J Epidemiol Community Health* 2000;54(4):254-61.
29. Latha KS, Bhat SM, D'Souza P. Suicide attempters in a general hospital unit in India: their socio-demographic and clinical profile--emphasis on cross-cultural aspects. *Acta Psychiatr Scand* 1996;94(1):26-30.
30. Srivastava MK, Sahoo RN, Ghotekar LH, et al. Risk factors associated with attempted suicide : a case control study. *Indian J Psychiatry* 2004;46(1):33-8.
31. Mary RA, Marslin G, Franklin G, et al. Test anxiety levels of board exam going students in Tamil Nadu, India. *Biomed Res Int* 2014;2014:578323. doi: 10.1155/2014/578323 [published Online First: 2014/08/22]
32. Kennedy J, King L. The political economy of farmers' suicides in India: indebted cash-crop farmers with marginal landholdings explain state-level variation in suicide rates. *Global Health* 2014;10:16. doi: 10.1186/1744-8603-10-16 [published Online First: 2014/03/29]
33. Munster D. Farmers' Suicides as Public Death: Politics, Agency and Statistics in a Suicide-Prone District (South India). *Modern Asian Studies* 2015;49(5):1580-605.
34. Spicer RS, Miller TR. Suicide acts in 8 states: incidence and case fatality rates by demographics and method. *Am J Public Health* 2000;90(12):1885-91. [published Online First: 2000/12/09]

- 1  
2  
3 35. Vijayakumar L, Jeyaseelan L, Kumar S, et al. A central storage facility to reduce  
4 pesticide suicides--a feasibility study from India. *BMC Public Health* 2013;13:850.  
5 doi: 10.1186/1471-2458-13-850 [published Online First: 2013/09/18]  
6  
7 36. Gunnell D, Ho D, Murray V. Medical management of deliberate drug overdose: a  
8 neglected area for suicide prevention? *Emerg Med J* 2004;21(1):35-8. [published  
9 Online First: 2004/01/22]  
10  
11 37. de Silva VA, Senanayake SM, Dias P, et al. From pesticides to medicinal drugs: time  
12 series analyses of methods of self-harm in Sri Lanka. *Bull World Health Organ*  
13 2012;90(1):40-6. doi: 10.2471/BLT.11.091785 [published Online First: 2012/01/25]  
14  
15 38. Till B, Wild TA, Arendt F, et al. Associations of Tabloid Newspaper Use With  
16 Endorsement of Suicide Myths, Suicide-Related Knowledge, and Stigmatizing  
17 Attitudes Toward Suicidal Individuals. *Crisis* 2018;39(6):428-37. doi: 10.1027/0227-  
18 5910/a000516 [published Online First: 2018/04/06]  
19  
20 39. Jamieson P, Jamieson K.H, Romer D. The Responsible Reporting of Suicide in Print  
21 Journalism. *AMERICAN BEHAVIORAL SCIENTIST* 2002;46(12):1643-60.  
22  
23  
24  
25  
26  
27  
28  
29  
30  
31  
32  
33  
34  
35  
36  
37  
38  
39  
40  
41  
42  
43  
44  
45  
46  
47  
48  
49  
50  
51  
52  
53  
54  
55  
56  
57  
58  
59  
60

Tables

Table 1: Binomial tests comparing the demographic characteristics of suicide decedents in newspaper reports vs. the population suicide statistics for Tamil Nadu

| Characteristics                   | Male            |                  |                      | Female          |                  |                      | Total           |                  |                      |
|-----------------------------------|-----------------|------------------|----------------------|-----------------|------------------|----------------------|-----------------|------------------|----------------------|
|                                   | Newspaper % (n) | Population % (n) | p-value <sup>a</sup> | Newspaper % (n) | Population % (n) | p-value <sup>a</sup> | Newspaper % (n) | Population % (n) | p-value <sup>a</sup> |
| <b>Age</b>                        |                 |                  |                      |                 |                  |                      |                 |                  |                      |
| <18 years                         | 7.1% (54)       | 4.2% (446)       | <0.001               | 13.0% (85)      | 10.7% (537)      | 0.071                | 9.8% (139)      | 6.2% (983)       | <0.001               |
| 18-29 years                       | 31.5% (239)     | 24.7% (2656)     | <0.001               | 50.2% (328)     | 40.1% (2022)     | <0.001               | 40.1% (567)     | 29.7% (4678)     | <0.001               |
| 30-44 years                       | 26.2% (199)     | 34.9% (3749)     | <0.001               | 21.3% (139)     | 25.6% (1291)     | 0.016                | 23.9% (338)     | 31.9% (5040)     | <0.001               |
| 45-59 years                       | 23.4% (178)     | 25.5% (2742)     | 0.194                | 13.8% (90)      | 14.8% (746)      | 0.481                | 19.0% (268)     | 22.1% (3488)     | 0.006                |
| 60+ years                         | 11.8% (90)      | 10.6% (1141)     | 0.296                | 1.8% (12)       | 8.8% (445)       | <0.001               | 7.2% (102)      | 10.1% (1586)     | 0.001                |
| Total                             | 100.0% (760)    | 100.0% (10734)   |                      | 100.0% (654)    | 100.0% (5041)    |                      | 100.0% (1,414)  | 100.0% (15775)   |                      |
| <b>Marital status<sup>b</sup></b> |                 |                  |                      |                 |                  |                      |                 |                  |                      |
| Unmarried                         | 26.8% (125)     | 23.5% (2459)     | 0.096                | 34.5% (180)     | 22.3% (1100)     | <0.001               | 30.9% (305)     | 23.1% (3559)     | <0.001               |
| Married                           | 63.6% (297)     | 73.4% (7682)     | <0.001               | 60.8% (317)     | 72.1% (3556)     | <0.001               | 62.1% (614)     | 73.0% (11238)    | <0.001               |
| Separated                         | 4.1% (19)       | 1.2% (128)       | <0.001               | 3.1% (16)       | 3.1% (155)       | 1.000                | 3.5% (35)       | 1.8% (283)       | <0.001               |
| Divorced                          | 0.0% (0)        | 0.3% (21)        | 0.236                | 0.4% (2)        | 0.8% (38)        | 0.286                | 0.2% (2)        | 0.4% (69)        | 0.325                |
| Widowed                           | 5.6% (26)       | 1.6% (164)       | <0.001               | 1.2% (6)        | 1.6% (80)        | 0.484                | 3.2% (32)       | 1.6% (244)       | <0.001               |
| Total                             | 100.0% (467)    | 100.0% (10464)   |                      | 100.0% (521)    | 100.0% (4929)    |                      | 100.0% (988)    | 100.0% (15393)   |                      |
| <b>Suicide method</b>             |                 |                  |                      |                 |                  |                      |                 |                  |                      |
| Hanging                           | 52.7% (436)     | 42.5% (4555)     | <0.001               | 51.2% (349)     | 38.0% (1916)     | <0.001               | 52.1% (785)     | 41.0% (6471)     | <0.001               |
| Poisoning                         | 20.3% (168)     | 39.7% (4260)     | <0.001               | 19.8% (135)     | 35.2% (1775)     | <0.001               | 20.1% (303)     | 38.3% (6035)     | <0.001               |
| Fire/self-immolation              | 9.3% (77)       | 6.0% (643)       | 0.001                | 12.0% (82)      | 19.2% (967)      | <0.001               | 10.5% (159)     | 10.2% (1610)     | 0.659                |
| Under vehicle/train               | 4.5% (37)       | 2.9% (309)       | 0.007                | 3.8% (26)       | 0.9% (45)        | <0.001               | 4.2% (63)       | 2.2% (354)       | <0.001               |
| Drowning                          | 3.0% (25)       | 3.3% (357)       | 0.656                | 4.7% (32)       | 3.4% (171)       | 0.061                | 3.8% (57)       | 3.3% (528)       | 0.297                |
| Jumping (off structure)           | 2.5% (21)       | 0.6% (60)        | <0.001               | 4.1% (28)       | 0.1% (7)         | <0.001               | 3.2% (49)       | 0.4% (67)        | <0.001               |
| Self-inflicted injury             | 0.7% (6)        | 0.6% (68)        | 0.642                | 2.3% (16)       | 0.4% (18)        | <0.001               | 1.5% (22)       | 0.5% (86)        | <0.001               |
| Other                             | 6.9% (57)       | 4.5% (482)       | 0.001                | 1.9% (13)       | 2.8% (142)       | 0.159                | 4.6% (70)       | 4.0% (624)       | 0.203                |
| Total                             | 100.0% (827)    | 100.0% (10734)   |                      | 100.0% (681)    | 100.0% (5041)    |                      | 100.0% (1508)   | 100.0% (15775)   |                      |

<sup>a</sup> Two-tailed binomial test on difference between two proportions using the “prtesti” command in Stata

<sup>b</sup> Excludes those listed as ‘unknown’ and ‘other’ in the NCRB data

1  
2  
3  
4 **Figure 1: Comparing the proportion of female decedents in newspaper suicide reports**  
5 **vs. the population suicide statistics for Tamil Nadu**  
6  
7  
8  
9  
10  
11  
12  
13  
14  
15  
16  
17  
18  
19  
20  
21  
22  
23  
24  
25  
26  
27  
28  
29  
30  
31  
32  
33  
34  
35  
36  
37  
38  
39  
40  
41  
42  
43  
44  
45  
46  
47  
48  
49  
50  
51  
52  
53  
54  
55  
56  
57  
58  
59  
60

For peer review only

1  
2  
3  
4  
5  
6  
7  
8  
9  
10  
11  
12  
13  
14  
15  
16  
17  
18  
19  
20  
21  
22  
23  
24  
25  
26  
27  
28  
29  
30  
31  
32  
33  
34  
35  
36  
37  
38  
39  
40  
41  
42  
43  
44  
45  
46  
47  
48  
49  
50  
51  
52  
53  
54  
55  
56  
57  
58  
59  
60

**Figure 2: Comparing the proportions of selected occupational groups of suicide decedents in newspaper reports vs. the population suicide statistics for Tamil Nadu**

For peer review only

**Figure 1: Comparing the proportion of female decedents in newspaper suicide reports vs. the population suicide statistics for Tamil Nadu**

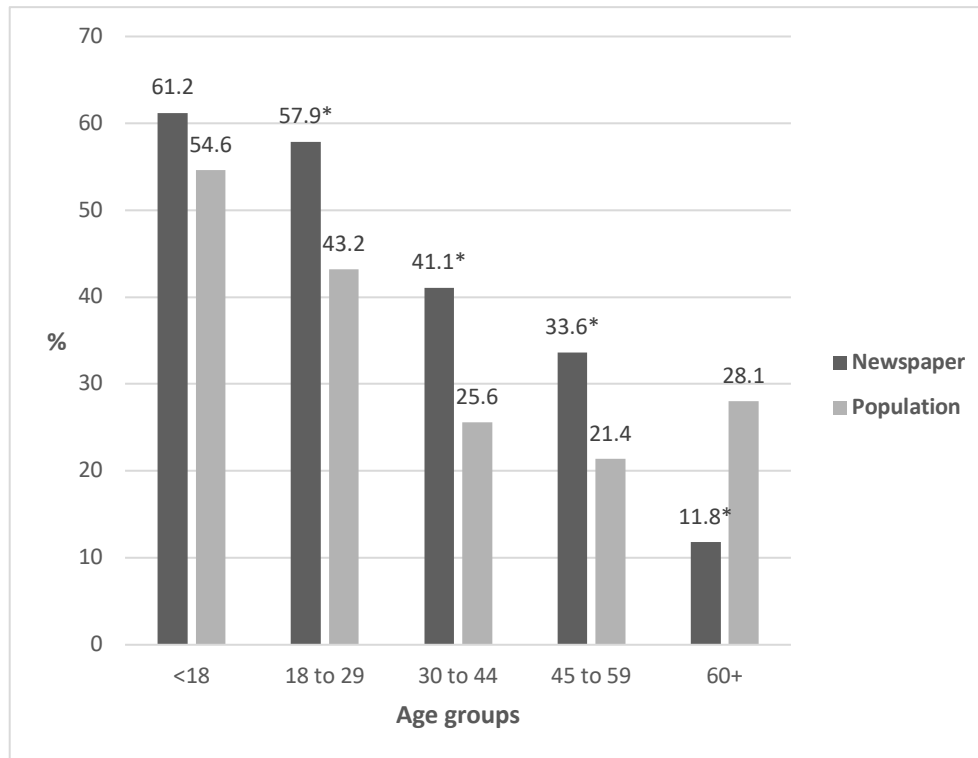

\*  $<0.05$ , based on two-sided binomial tests within each age group to calculate if the proportion of suicide deceased in the newspaper articles that were female was different to that in the official suicide statistics

**Figure 2: Comparing the proportions of selected occupational groups of suicide decedents in newspaper reports vs. the population suicide statistics for Tamil Nadu**

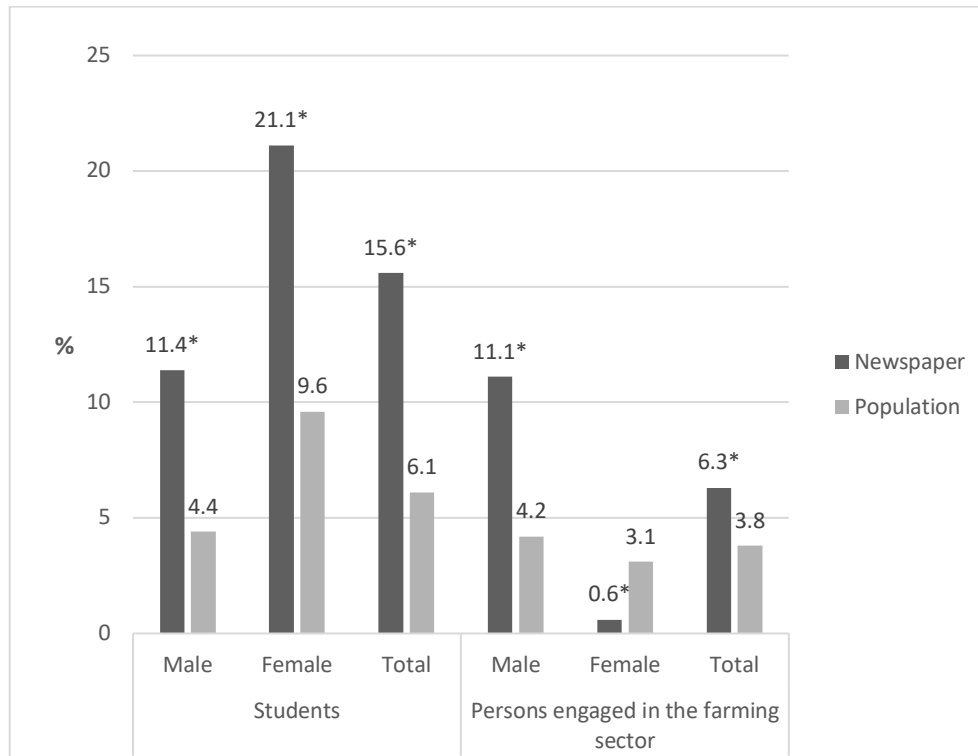

Note: The occupational categories of 'student' and 'persons engaged in the farming sector' were the only categories in the official statistics that were distinct enough to compare to the data we extracted from newspaper reports. Other occupational categories in the official suicide statistics (e.g. 'professionals/salaried persons') were too broad to be reproduced.

\*  $<0.05$ , based on two-sided binomial tests within each age group to calculate if the proportion of suicide deceased in the newspaper articles that were female was different to that in the official suicide statistics



**Supplementary File 1: Secondary analyses only including media reports of suicides of people from Tamil Nadu**

**Figure 1: Comparing the proportion of female decedents in newspaper suicide reports vs. the population suicide statistics for Tamil Nadu**

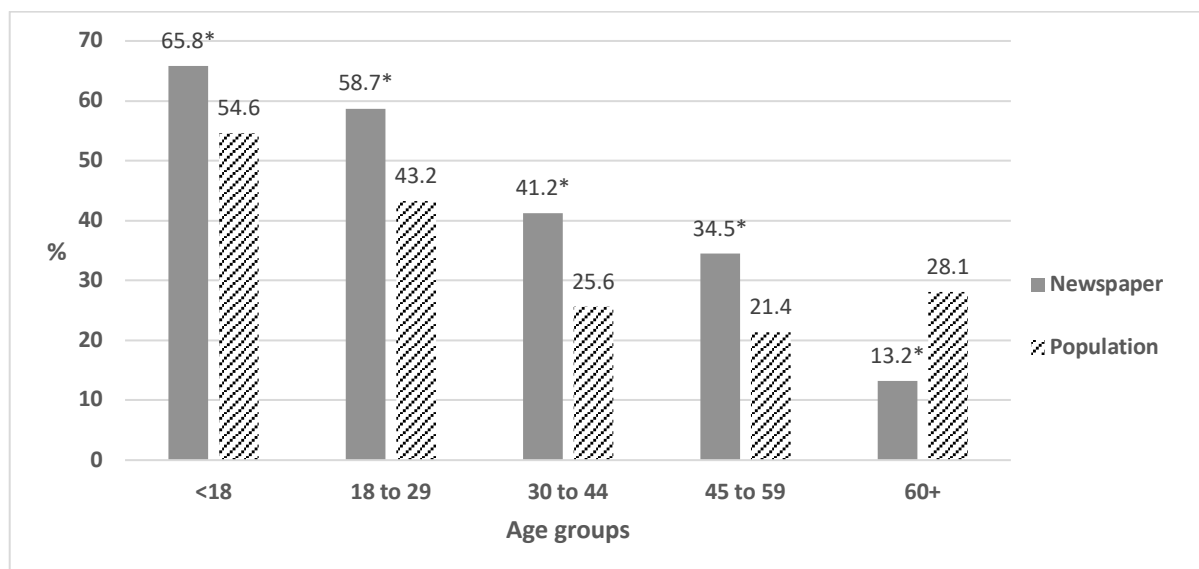

Note: Only includes newspaper reports of suicides of people residing in Tamil Nadu

\* <0.05, based on two-sided binomial tests within each age group to calculate if the proportion of suicide deceased in the newspaper articles that were female was different to that in the official suicide statistics

**Figure 2: Comparing the proportions of selected occupational groups of suicide decedents in newspaper reports vs. the population suicide statistics for Tamil Nadu**



Note 1: Only includes newspaper reports of suicides of people residing in Tamil Nadu

Note 2: The occupational categories of 'student' and 'persons engaged in the farming sector' were the only categories in the official statistics that were distinct enough to compare to the data we extracted from newspaper reports. Other occupational categories in the official suicide statistics (e.g. 'professionals/salaried persons') were too broad to be reproduced.

\* <math>p < 0.05</math>, based on two-sided binomial tests within each age group to calculate if the proportion of suicide deceased in the newspaper articles that were female was different to that in the official suicide statistics

**Table 1: Binomial tests comparing the demographic characteristics of suicide decedents in newspaper reports vs. the population suicide statistics for Tamil Nadu**

| Characteristics                   | Male            |                  |                      | Female          |                  |                      | Total           |                  |                      |
|-----------------------------------|-----------------|------------------|----------------------|-----------------|------------------|----------------------|-----------------|------------------|----------------------|
|                                   | Newspaper % (n) | Population % (n) | p-value <sup>a</sup> | Newspaper % (n) | Population % (n) | p-value <sup>a</sup> | Newspaper % (n) | Population % (n) | p-value <sup>a</sup> |
| <b>Age</b>                        |                 |                  |                      |                 |                  |                      |                 |                  |                      |
| <18 years                         | 6.3% (41)       | 4.2% (446)       | 0.012                | 13.5% (79)      | 10.7% (537)      | 0.040                | 9.7% (120)      | 6.2% (983)       | <0.001               |
| 18-29 years                       | 32.2% (209)     | 24.7% (2656)     | <0.001               | 50.6% (297)     | 40.1% (2022)     | <0.001               | 40.9% (506)     | 29.7% (4678)     | <0.001               |
| 30-44 years                       | 26.6% (173)     | 34.9% (3749)     | <0.001               | 20.6% (121)     | 25.6% (1291)     | 0.008                | 23.8% (294)     | 31.9% (5040)     | <0.001               |
| 45-59 years                       | 22.8% (148)     | 25.5% (2742)     | 0.124                | 13.3% (78)      | 14.8% (746)      | 0.331                | 18.3% (226)     | 22.1% (3488)     | 0.002                |
| 60+ years                         | 12.2% (79)      | 10.6% (1141)     | 0.200                | 2.0% (12)       | 8.8% (445)       | <0.001               | 7.4% (91)       | 10.1% (1586)     | 0.002                |
| Total                             | 100.0% (650)    | 100.0% (10734)   |                      | 100.0% (587)    | 100.0% (5041)    |                      | 100.0% (1237)   | 100.0% (15775)   |                      |
| <b>Marital status<sup>b</sup></b> |                 |                  |                      |                 |                  |                      |                 |                  |                      |
| Unmarried                         | 26.3% (105)     | 23.5% (2459)     | 0.196                | 34.8% (162)     | 22.3% (1100)     | <0.001               | 30.9% (267)     | 23.1% (3559)     | <0.001               |
| Married                           | 64.3% (257)     | 73.4% (7682)     | <0.001               | 60.4% (281)     | 72.1% (3556)     | <0.001               | 62.2% (534)     | 73.0% (11238)    | <0.001               |
| Separated                         | 4.5% (18)       | 1.2% (128)       | <0.001               | 3.2% (15)       | 3.1% (155)       | 0.906                | 3.8% (33)       | 1.8% (283)       | <0.001               |
| Divorced                          | 0.0% (0)        | 0.3% (21)        | 0.273                | 0.2% (1)        | 0.8% (38)        | 0.151                | 0.1% (1)        | 0.4% (69)        | 0.167                |
| Widowed                           | 5.0% (20)       | 1.6% (164)       | <0.001               | 1.3% (6)        | 1.6% (80)        | 0.619                | 3.0% (26)       | 1.6% (244)       | <0.001               |
| Total                             | 100.0% (400)    | 100.0% (10464)   |                      | 100.0% (465)    | 100.0% (4929)    |                      | 100.0% (988)    | 100.0% (15393)   |                      |
| <b>Suicide method</b>             |                 |                  |                      |                 |                  |                      |                 |                  |                      |
| Hanging                           | 52.9% (358)     | 42.5% (4555)     | <0.001               | 52.4% (313)     | 38.0% (1916)     | <0.001               | 52.7% (671)     | 41.0% (6471)     | <0.001               |
| Poisoning                         | 21.4% (145)     | 39.7% (4260)     | <0.001               | 20.1% (120)     | 35.2% (1775)     | <0.001               | 20.8% (265)     | 38.3% (6035)     | <0.001               |
| Fire/self-immolation              | 11.2% (76)      | 6.0% (643)       | <0.001               | 12.1% (72)      | 19.2% (967)      | <0.001               | 11.6% (148)     | 10.2% (1610)     | 0.114                |
| Under vehicle/train               | 4.7% (32)       | 2.9% (309)       | 0.008                | 4.4% (26)       | 0.9% (45)        | <0.001               | 4.6% (58)       | 2.2% (354)       | <0.001               |
| Drowning                          | 3.3% (22)       | 3.3% (357)       | 1.000                | 4.0% (24)       | 3.4% (171)       | 0.448                | 3.6% (46)       | 3.3% (528)       | 0.566                |
| Jumping (off structure)           | 1.9% (13)       | 0.6% (60)        | <0.001               | 3.5% (21)       | 0.1% (7)         | <0.001               | 2.7% (34)       | 0.4% (67)        | <0.001               |
| Self-inflicted injury             | 0.9% (6)        | 0.6% (68)        | 0.334                | 2.2% (13)       | 0.4% (18)        | <0.001               | 1.5% (19)       | 0.5% (86)        | <0.001               |
| Other                             | 3.7% (25)       | 4.5% (482)       | 0.328                | 1.3% (8)        | 2.8% (142)       | 0.031                | 2.6% (33)       | 4.0% (624)       | 0.013                |
| Total                             | 100.0% (677)    | 100.0% (10734)   |                      | 100.0% (597)    | 100.0% (5041)    |                      | 100.0% (1274)   | 100.0% (15775)   |                      |

Note: Only includes newspaper reports of suicides of people residing in Tamil Nadu

<sup>a</sup> Two-tailed binomial test on difference between two proportions using the "prtesti" command in Stata

<sup>b</sup> Excludes those listed as 'unknown' and 'other' in the NCRB data

STROBE Statement—Checklist of items that should be included in reports of *cross-sectional studies*

|                              | Item No | Recommendation                                                                                                                                                                                    | Page No |
|------------------------------|---------|---------------------------------------------------------------------------------------------------------------------------------------------------------------------------------------------------|---------|
| <b>Title and abstract</b>    | 1       | (a) Indicate the study's design with a commonly used term in the title or the abstract                                                                                                            | 1       |
|                              |         | (b) Provide in the abstract an informative and balanced summary of what was done and what was found                                                                                               | 1-2     |
| <b>Introduction</b>          |         |                                                                                                                                                                                                   |         |
| Background/rationale         | 2       | Explain the scientific background and rationale for the investigation being reported                                                                                                              | 3       |
| Objectives                   | 3       | State specific objectives, including any prespecified hypotheses                                                                                                                                  | 3       |
| <b>Methods</b>               |         |                                                                                                                                                                                                   |         |
| Study design                 | 4       | Present key elements of study design early in the paper                                                                                                                                           | 4       |
| Setting                      | 5       | Describe the setting, locations, and relevant dates, including periods of recruitment, exposure, follow-up, and data collection                                                                   | 4       |
| Participants                 | 6       | (a) Give the eligibility criteria, and the sources and methods of selection of participants                                                                                                       | N/A     |
| Variables                    | 7       | Clearly define all outcomes, exposures, predictors, potential confounders, and effect modifiers. Give diagnostic criteria, if applicable                                                          | 4       |
| Data sources/<br>measurement | 8*      | For each variable of interest, give sources of data and details of methods of assessment (measurement). Describe comparability of assessment methods if there is more than one group              | 4       |
| Bias                         | 9       | Describe any efforts to address potential sources of bias                                                                                                                                         | 4-5     |
| Study size                   | 10      | Explain how the study size was arrived at                                                                                                                                                         | 4       |
| Quantitative variables       | 11      | Explain how quantitative variables were handled in the analyses. If applicable, describe which groupings were chosen and why                                                                      | 4-5     |
| Statistical methods          | 12      | (a) Describe all statistical methods, including those used to control for confounding                                                                                                             | 4-5     |
|                              |         | (b) Describe any methods used to examine subgroups and interactions                                                                                                                               | 4-5     |
|                              |         | (c) Explain how missing data were addressed                                                                                                                                                       | 4-5     |
|                              |         | (d) If applicable, describe analytical methods taking account of sampling strategy                                                                                                                | N/A     |
|                              |         | (e) Describe any sensitivity analyses                                                                                                                                                             | N/A     |
| <b>Results</b>               |         |                                                                                                                                                                                                   |         |
| Participants                 | 13*     | (a) Report numbers of individuals at each stage of study—eg numbers potentially eligible, examined for eligibility, confirmed eligible, included in the study, completing follow-up, and analysed | N/A     |
|                              |         | (b) Give reasons for non-participation at each stage                                                                                                                                              | N/A     |
|                              |         | (c) Consider use of a flow diagram                                                                                                                                                                | N/A     |
| Descriptive data             | 14*     | (a) Give characteristics of study participants (eg demographic, clinical, social) and information on exposures and potential confounders                                                          | N/A     |
|                              |         | (b) Indicate number of participants with missing data for each variable of interest                                                                                                               | N/A     |
| Outcome data                 | 15*     | Report numbers of outcome events or summary measures                                                                                                                                              | N/A     |

|    |                          |    |                                                                                                                                                                                                              |
|----|--------------------------|----|--------------------------------------------------------------------------------------------------------------------------------------------------------------------------------------------------------------|
| 1  |                          |    |                                                                                                                                                                                                              |
| 2  | Main results             | 16 | (a) Give unadjusted estimates and, if applicable, confounder-adjusted estimates and their precision (eg, 95% confidence interval). Make clear which confounders were adjusted for and why they were included |
| 3  |                          |    | 6 (and tables /figures)                                                                                                                                                                                      |
| 4  |                          |    |                                                                                                                                                                                                              |
| 5  |                          |    |                                                                                                                                                                                                              |
| 6  |                          |    |                                                                                                                                                                                                              |
| 7  |                          |    | (b) Report category boundaries when continuous variables were categorized                                                                                                                                    |
| 8  |                          |    | N/A                                                                                                                                                                                                          |
| 9  |                          |    |                                                                                                                                                                                                              |
| 10 |                          |    | (c) If relevant, consider translating estimates of relative risk into absolute risk for a meaningful time period                                                                                             |
| 11 |                          |    | N/A                                                                                                                                                                                                          |
| 12 | Other analyses           | 17 | Report other analyses done—eg analyses of subgroups and interactions, and sensitivity analyses                                                                                                               |
| 13 |                          |    | N/A                                                                                                                                                                                                          |
| 14 |                          |    |                                                                                                                                                                                                              |
| 15 | <b>Discussion</b>        |    |                                                                                                                                                                                                              |
| 16 | Key results              | 18 | Summarise key results with reference to study objectives                                                                                                                                                     |
| 17 |                          |    | 6                                                                                                                                                                                                            |
| 18 | Limitations              | 19 | Discuss limitations of the study, taking into account sources of potential bias or imprecision. Discuss both direction and magnitude of any potential bias                                                   |
| 19 |                          |    | 8                                                                                                                                                                                                            |
| 20 |                          |    |                                                                                                                                                                                                              |
| 21 | Interpretation           | 20 | Give a cautious overall interpretation of results considering objectives, limitations, multiplicity of analyses, results from similar studies, and other relevant evidence                                   |
| 22 |                          |    | 6-7                                                                                                                                                                                                          |
| 23 |                          |    |                                                                                                                                                                                                              |
| 24 |                          |    |                                                                                                                                                                                                              |
| 25 | Generalisability         | 21 | Discuss the generalisability (external validity) of the study results                                                                                                                                        |
| 26 |                          |    | 8                                                                                                                                                                                                            |
| 27 | <b>Other information</b> |    |                                                                                                                                                                                                              |
| 28 | Funding                  | 22 | Give the source of funding and the role of the funders for the present study and, if applicable, for the original study on which the present article is based                                                |
| 29 |                          |    | 9                                                                                                                                                                                                            |
| 30 |                          |    |                                                                                                                                                                                                              |
| 31 |                          |    |                                                                                                                                                                                                              |
| 32 |                          |    |                                                                                                                                                                                                              |

\*Give information separately for exposed and unexposed groups.

**Note:** An Explanation and Elaboration article discusses each checklist item and gives methodological background and published examples of transparent reporting. The STROBE checklist is best used in conjunction with this article (freely available on the Web sites of PLoS Medicine at <http://www.plosmedicine.org/>, Annals of Internal Medicine at <http://www.annals.org/>, and Epidemiology at <http://www.epidem.com/>). Information on the STROBE Initiative is available at [www.strobe-statement.org](http://www.strobe-statement.org).
